# Supplementary material for: Mononuclear and binuclear cobalt carbonyl nitrosyls: comparison with isoelectronic nickel carbonyls
Source: Royal Society of Chemistry journal article supplement (doi:10.1039/b908030a), 2009-01-01
Supplement: b908030a.pdf [file b908030a.pdf]

# Mononuclear and Binuclear Cobalt Carbonyl Nitrosyls: Comparison with Isoelectronic Nickel Carbonyls

Xiaoli Gong,<sup>a</sup> Qian-shu Li,<sup>\*a,b</sup> Yaoming Xie,<sup>c</sup> R. Bruce King,<sup>\*b,c</sup> and Henry F. Schaefer III<sup>c</sup>

<sup>a</sup>Institute of Chemical Physics, Beijing Institute of Technology, Beijing 100081, P. R. China

<sup>b</sup>Center for Computational Quantum Chemistry, School of Chemistry and Environment, South China Normal University, Guangzhou 510631, P. R. China

<sup>c</sup>Department of Chemistry and Center for Computational Chemistry, University of Georgia, Athens, Georgia 30602, USA

## Supporting Information

**Tables S1-S17:** The theoretical harmonic vibrational frequencies for the 32 structures of  $\text{Co}_2(\text{NO})_2(\text{CO})_n$  ( $n = 5, 4, 3, 2$ ) and  $\text{Co}(\text{NO})(\text{CO})_m$  ( $m = 4, 3, 2, 1$ ) using the BP86 and B3LYP method.

**Tables S18-S49:** Theoretical Cartesian coordinates for the 32 structures of  $\text{Co}_2(\text{NO})_2(\text{CO})_n$  ( $n = 5, 4, 3, 2$ ) and  $\text{Co}(\text{NO})(\text{CO})_m$  ( $m = 4, 3, 2, 1$ ) using the BP86/DZP method.

**Table S1.** Theoretical harmonic vibrational frequencies (in  $\text{cm}^{-1}$ ) for the structures of  $\text{Co}(\text{NO})(\text{CO})_4$  by BP86/DZP method (infrared intensities in parentheses are in  $\text{km/mol}$ ).

| <b>14S-1(C<sub>s</sub>)</b> |                    | <b>14T-1(C<sub>s</sub>)</b> |                     |
|-----------------------------|--------------------|-----------------------------|---------------------|
| BP86                        | B3LYP              | BP86                        | B3LYP               |
| 50.5(a'',0.0)               | 55.9 (a'', 0.0)    | 47.6(a',0.1)                | 8.7 (a'', 0.0)      |
| 56.3(a',0.1)                | 57.1 (a', 0.1)     | 52.4(a'',0.1)               | 22.5 (a'', 0.0)     |
| 78.0(a',0.1)                | 82.5 (a', 0.1)     | 64.7(a'',0.0)               | 30.7 (a'', 0.1)     |
| 79.7(a'',0.0)               | 82.8 (a'', 0.1)    | 76.7(a',0.0)                | 36.4 (a'', 0.1)     |
| 87.6(a',0.0)                | 90.2 (a'', 0.0)    | 81.2(a'',0.0)               | 58.5 (a'', 0.0)     |
| 90.3(a'',0.0)               | 92.9 (a', 0.1)     | 87.4(a',0.1)                | 60.7 (a'', 0.0)     |
| 103.2(a',0.0)               | 109.1 (a', 0.2)    | 91.2(a',0.1)                | 75.5 (a'', 0.2)     |
| 152.9(a'',0.2)              | 160.7 (a'', 1.2)   | 96.2(a'',0.7)               | 78.1 (a'', 0.2)     |
| 222.5(a',31.4)              | 242.2 (a', 27.9)   | 171.7(a',11.3)              | 83.6 (a'', 0.4)     |
| 314.8(a'',0.1)              | 320.2 (a'', 0.3)   | 281.0(a',1.9)               | 110.7 (a'', 0.4)    |
| 334.9(a',8.4)               | 337.4 (a', 17.1)   | 306.9(a'',0.3)              | 287.2 (a'', 0.2)    |
| 345.9(a'',0.0)              | 361.2 (a'', 0.5)   | 333.0(a'',1.1)              | 311.9 (a'', 0.0)    |
| 380.6(a',5.6)               | 367.6 (a', 6.2)    | 338.4(a',1.7)               | 343.8 (a'', 4.5)    |
| 415.9(a',8.5)               | 390.2 (a', 11.1)   | 389.8(a',0.7)               | 368.1 (a', 0.1)     |
| 441.3(a',20.9)              | 420.3 (a', 22.4)   | 434.4(a',4.2)               | 410.8 (a'', 18.4)   |
| 458.2(a'',4.9)              | 463.5 (a'', 12.7)  | 439.7(a'',12.0)             | 413.9 (a'', 2.9)    |
| 473.0(a',2.7)               | 467.4 (a'', 35.0)  | 448.2(a',9.0)               | 423.5 (a'', 0.1)    |
| 489.1(a'',5.5)              | 481.7 (a', 3.5)    | 453.3(a',4.6)               | 449.0 (a'', 17.2)   |
| 498.9(a',10.9)              | 504.6 (a', 21.3)   | 458.1(a'',6.7)              | 472.8 (a'', 65.7)   |
| 507.6(a'',60.3)             | 511.8 (a'', 29.7)  | 500.8(a'',39.8)             | 474.3 (a'', 25.7)   |
| 526.6(a',82.3)              | 527.8 (a', 78.0)   | 513.1(a',55.7)              | 486.7 (a'', 56.9)   |
| 562.8(a',38.5)              | 580.5 (a', 29.7)   | 516.4(a',65.8)              | 862.1 (a'', 216.7)  |
| 1693.1(a',734.2)            | 1714.8 (a', 882.3) | 1630.1(a',565.7)            | 1969.2 (a', 67.1)   |
| 1995.9(a'',993.4)           | 2085.4(a'',1142.4) | 2005.2(a'',1017.2)          | 2074.9(a',1247.3)   |
| 2001.7(a',982.4)            | 2093.0(a',1009.5)  | 2009.4(a',534.6)            | 2087.7 (a', 777.8)  |
| 2005.3(a',499.2)            | 2102.0 (a', 597.1) | 2011.9(a',831.3)            | 2155.0 (a', 13.3)   |
| 2063.9(a',93.0)             | 2159.0 (a', 139.6) | 2069.8(a',77.8)             | 2907.4 (a'', 269.2) |

**Table S2.** Theoretical harmonic vibrational frequencies (in  $\text{cm}^{-1}$ ) for the structures of  $\text{Co}(\text{NO})(\text{CO})_3$ .

| <b>13S-1(C<sub>3v</sub>)</b>   |                                | <b>13T-1(C<sub>s</sub>)</b> |                     |
|--------------------------------|--------------------------------|-----------------------------|---------------------|
| BP86                           | B3LYP                          | BP86                        | B3LYP               |
| 59.8(e,0.0)                    | 59.4 (e, 0.0)                  | 56.9(a",0.0)                | 51.7 (a", 0.0)      |
| 59.8(e,0.0)                    | 59.4 (e, 0.0)                  | 63.2(a',0.1)                | 60.9 (a', 0.1)      |
| 76.7(e,0.0)                    | 78.6 (e, 0.1)                  | 69.9(a",0.1)                | 71.0 (a", 0.1)      |
| 76.7(e,0.0)                    | 78.6 (e, 0.1)                  | 76.4(a',0.2)                | 75.8 (a', 0.1)      |
| 84.7(a <sub>1</sub> ,0.0)      | 86.9 (a <sub>1</sub> , 0.0)    | 88.2(a',0.1)                | 82.5 (a', 0.3)      |
| 292.3(e,0.0)                   | 295.3 (e, 0.3)                 | 203.3(a",0.0)               | 218.8 (a", 0.4)     |
| 292.3(e,0.0)                   | 295.3 (e, 0.3)                 | 242.6(a',0.7)               | 229.6 (a', 1.8)     |
| 322.2(a <sub>2</sub> ,0.0)     | 321.6 (a <sub>2</sub> , 0.0)   | 301.1(a",0.2)               | 289.6 (a", 0.3)     |
| 425.1(a <sub>1</sub> ,0.2)     | 407.3 (a <sub>1</sub> , 3.7)   | 333.3(a",1.4)               | 343.0 (a", 0.0)     |
| 474.5(e,3.4)                   | 455.0 (e, 14.8)                | 373.5(a',1.0)               | 353.4 (a', 5.5)     |
| 474.5(e,3.4)                   | 455.0 (e, 14.8)                | 423.7(a',0.7)               | 376.2 (a', 21.5)    |
| 490.4(a <sub>1</sub> ,54.4)    | 490.5 (a <sub>1</sub> , 63.4)  | 426.5(a",0.0)               | 401.3 (a', 11.5)    |
| 509.0(e,20.5)                  | 501.8 (e, 24.4)                | 440.6(a',20.2)              | 428.3 (a", 12.6)    |
| 509.0(e,20.5)                  | 501.8 (e, 24.4)                | 463.9(a',31.3)              | 448.4 (a', 59.7)    |
| 591.3(e,60.6)                  | 599.8 (e, 48.8)                | 486.8(a',14.2)              | 457.2 (a", 46.7)    |
| 591.3(e,60.6)                  | 599.8 (e, 48.8)                | 491.4(a",43.0)              | 464.4 (a', 9.6)     |
| 620.2(a <sub>1</sub> ,8.8)     | 639.0 (a <sub>1</sub> , 9.1)   | 565.1(a',14.1)              | 518.9 (a', 16.2)    |
| 1839.7(a <sub>1</sub> ,1014.9) | 1897.2(a <sub>1</sub> ,1369.2) | 1673.7(a',702.3)            | 1745.6 (a', 1031.2) |
| 2005.9(e,868.5)                | 2095.5 (e, 974.2)              | 1989.9(a",1040.1)           | 2081.3(a", 1197.9)  |
| 2005.9(e,868.4)                | 2095.5 (e, 974.1)              | 1995.1(a',768.0)            | 2098.4 (a', 847.6)  |
| 2063.4(a <sub>1</sub> ,165.3)  | 2153.9(a <sub>1</sub> , 205.4) | 2046.4(a',261.6)            | 2146.5 (a', 334.3)  |

**Table S3.** Theoretical harmonic vibrational frequencies (in  $\text{cm}^{-1}$ ) for the structures of  $\text{Co}(\text{NO})(\text{CO})_2$ .

| <b>12S-1(<math>C_s</math>)</b> |                    | <b>12T-1(<math>C_{2v}</math>)</b> |                                 |
|--------------------------------|--------------------|-----------------------------------|---------------------------------|
| BP86                           | B3LYP              | BP86                              | B3LYP                           |
| 65.1(a",0.3)                   | 49.8 (a', 1.5)     | 52.0(b <sub>2</sub> ,0.0)         | 52.0 (b <sub>2</sub> , 0.0)     |
| 65.3(a',0.9)                   | 58.6 (a", 0.7)     | 69.9(a <sub>1</sub> ,0.0)         | 67.2 (a <sub>1</sub> , 0.0)     |
| 73.6(a',0.3)                   | 71.7 (a', 0.1)     | 76.7(b <sub>1</sub> ,0.9)         | 75.9 (b <sub>1</sub> , 1.4)     |
| 274.6(a',1.7)                  | 264.9 (a', 2.4)    | 263.3(b <sub>1</sub> ,0.0)        | 235.8 (b <sub>1</sub> , 0.1)    |
| 281.0(a",0.6)                  | 286.1 (a", 1.1)    | 288.0(a <sub>2</sub> ,0.0)        | 279.1 (a <sub>2</sub> , 0.0)    |
| 308.6(a",1.1)                  | 306.5 (a", 0.1)    | 299.7(b <sub>2</sub> ,0.0)        | 303.1 (b <sub>2</sub> , 0.2)    |
| 457.1(a',0.4)                  | 425.6 (a', 6.1)    | 423.5(a <sub>1</sub> ,5.0)        | 387.5 (a <sub>1</sub> , 21.7)   |
| 493.4(a',13.0)                 | 458.5 (a', 2.7)    | 475.9(a <sub>1</sub> ,27.6)       | 445.0 (b <sub>2</sub> , 56.3)   |
| 500.2(a",31.4)                 | 470.9 (a", 53.5)   | 479.3(b <sub>2</sub> ,29.4)       | 466.5 (a <sub>1</sub> , 47.8)   |
| 518.1(a',24.7)                 | 500.7 (a', 46.3)   | 498.9(b <sub>1</sub> ,7.9)        | 466.8 (b <sub>1</sub> , 5.4)    |
| 588.0(a",38.3)                 | 611.8 (a", 41.3)   | 534.6(b <sub>2</sub> ,27.0)       | 506.6 (a <sub>1</sub> , 0.0)    |
| 643.6(a',2.9)                  | 666.5 (a', 7.7)    | 541.3(a <sub>1</sub> ,0.0)        | 513.5 (b <sub>2</sub> , 27.2)   |
| 1812.5(a',976.2)               | 1875.3(a',1342.2)  | 1770.5(a <sub>1</sub> ,963.0)     | 1807.1(a <sub>1</sub> , 1176.9) |
| 1976.4(a",1145.0)              | 2072.8(a",1332.1)  | 1984.6(b <sub>2</sub> ,1082.8)    | 2079.3(b <sub>2</sub> , 1248.6) |
| 2033.9(a',279.0)               | 2132.8 (a', 333.3) | 2036.5(a <sub>1</sub> ,365.9)     | 2132.8 (a <sub>1</sub> , 467.6) |

**Table S4.** Theoretical harmonic vibrational frequencies (in  $\text{cm}^{-1}$ ) for the structures of  $\text{Co}(\text{NO})(\text{CO})$

| <b>11S-1(<math>C_s</math>)</b> |                    | <b>11T-1(<math>C_s</math>)</b> |                    |
|--------------------------------|--------------------|--------------------------------|--------------------|
| BP86                           | B3LYP              | BP86                           | B3LYP              |
| 83.5(a',1.2)                   | 79.3 (a', 1.5)     | 54.3(a',1.7)                   | 53.3 (a', 2.3)     |
| 280.2(a",1.6)                  | 275.1 (a", 3.6)    | 224.4(a",0.0)                  | 181.9 (a", 2.2)    |
| 306.2(a',1.4)                  | 304.0 (a', 1.7)    | 279.3(a',3.1)                  | 264.0 (a', 4.9)    |
| 387.7(a",10.7)                 | 382.1 (a", 9.1)    | 333.5(a",2.4)                  | 331.0 (a", 7.0)    |
| 543.0(a',15.4)                 | 514.7 (a', 37.1)   | 469.4(a',13.1)                 | 417.1 (a', 25.9)   |
| 564.0(a',6.2)                  | 564.8 (a', 4.5)    | 496.4(a',7.8)                  | 434.5 (a', 30.0)   |
| 685.5(a',3.5)                  | 711.9 (a', 4.1)    | 550.6(a',6.9)                  | 507.5 (a', 28.8)   |
| 1799.5(a',874.7)               | 1858.2(a',1208.0)  | 1757.2(a',965.5)               | 1782.5(a',1480.5)  |
| 1990.8(a',555.7)               | 2088.7 (a', 707.3) | 1997.9(a',721.9)               | 2102.4 (a', 983.1) |

**Table S5.** Theoretical harmonic vibrational frequencies (in  $\text{cm}^{-1}$ ) for the structures of  $\text{Co}_2(\text{NO})_2(\text{CO})_5$ .

| <b>25S-1(C<sub>1</sub>)</b> |                  | <b>25S-2(C<sub>2</sub>)</b> |                    |
|-----------------------------|------------------|-----------------------------|--------------------|
| BP86                        | B3LYP            | BP86                        | B3LYP              |
| 25.6(a,0.0)                 | 21.0 (a, 0.0)    | 17.2(b,0.1)                 | -3.5 (b, 0.1)      |
| 27.3(a,0.0)                 | 23.3 (a, 0.0)    | 28.6(a,0.0)                 | 25.8 (a, 0.0)      |
| 54.3(a,0.1)                 | 51.0 (a, 0.1)    | 52.8(a,0.0)                 | 49.8 (a, 0.1)      |
| 60.4(a,0.0)                 | 58.0 (a, 0.1)    | 54.7(b,0.1)                 | 53.0 (b, 0.0)      |
| 63.0(a,0.0)                 | 61.7 (a, 0.0)    | 58.2(a,0.0)                 | 56.5 (a, 0.0)      |
| 69.6(a,0.0)                 | 68.4 (a, 0.1)    | 60.4(b,0.0)                 | 59.2 (b, 0.1)      |
| 74.1(a,0.3)                 | 74.2 (a, 0.1)    | 68.7(a,0.1)                 | 68.6 (a, 0.2)      |
| 75.8(a,0.3)                 | 77.4 (a, 0.1)    | 70.7(b,0.2)                 | 73.0 (b, 0.1)      |
| 79.4(a,0.0)                 | 80.6 (a, 0.1)    | 82.5(a,0.0)                 | 81.3 (a, 0.0)      |
| 83.8(a,0.1)                 | 85.9 (a, 0.2)    | 83.7(b,0.2)                 | 85.4 (b, 0.2)      |
| 91.5(a,0.0)                 | 92.8 (a, 0.0)    | 95.2(b,0.0)                 | 96.4 (b, 0.2)      |
| 100.4(a,0.1)                | 100.3 (a, 0.1)   | 97.5(a,0.0)                 | 97.5 (a, 0.0)      |
| 178.4(a,0.9)                | 171.7 (a, 6.4)   | 170.2(a,0.2)                | 157.3 (a, 0.5)     |
| 239.4(a,1.7)                | 231.8 (a, 3.6)   | 241.6(b,1.9)                | 235.8 (b, 10.5)    |
| 279.1(a,0.6)                | 283.5 (a, 0.7)   | 279.8(b,1.7)                | 282.3 (b, 5.3)     |
| 308.3(a,2.4)                | 311.2 (a, 1.9)   | 291.0(a,0.1)                | 293.9 (a, 0.0)     |
| 320.6(a,1.7)                | 323.9 (a, 4.1)   | 320.4(b,1.8)                | 326.2 (b, 0.5)     |
| 341.7(a,0.3)                | 342.2 (a, 0.5)   | 350.4(b,2.8)                | 344.0 (b, 19.7)    |
| 355.3(a,1.4)                | 357.3 (a, 6.0)   | 351.5(a,0.4)                | 352.6 (a, 0.3)     |
| 391.4(a,10.3)               | 385.6 (a, 23.6)  | 379.9(a,0.0)                | 364.4 (a, 0.8)     |
| 427.3(a,1.7)                | 412.0 (a, 3.4)   | 420.6(a,0.0)                | 410.7 (b, 94.7)    |
| 454.9(a,6.2)                | 435.9 (a, 5.2)   | 436.3(b,54.2)               | 414.2 (a, 2.2)     |
| 458.9(a,55.8)               | 441.0 (a, 41.7)  | 452.9(b,20.3)               | 437.5 (a, 8.5)     |
| 464.6(a,3.8)                | 453.4 (a, 21.5)  | 462.2(a,8.2)                | 442.3 (b, 15.5)    |
| 474.4(a,9.4)                | 461.1 (a, 16.8)  | 478.7(b,58.6)               | 453.7 (b, 55.8)    |
| 479.5(a,9.7)                | 464.4 (a, 11.8)  | 500.0(a,16.1)               | 479.2 (a, 35.4)    |
| 492.4(a,12.5)               | 473.9 (a, 29.9)  | 508.0(b,66.3)               | 499.0 (b, 200.8)   |
| 505.4(a,36.6)               | 506.2 (a, 67.0)  | 515.2(a,2.6)                | 509.6 (b, 41.2)    |
| 514.8(a,21.8)               | 508.6 (a, 8.5)   | 519.1(b,179.2)              | 513.0 (a, 0.2)     |
| 526.5(a,57.3)               | 541.1 (a, 30.7)  | 561.5(a,71.5)               | 565.4 (a, 38.9)    |
| 541.6(a,74.2)               | 547.4(a,108.0)   | 573.5(a,2.8)                | 583.5 (b, 14.6)    |
| 548.1(a,38.9)               | 556.0 (a, 38.3)  | 575.1(b,30.6)               | 585.5 (a, 20.6)    |
| 563.7(a,32.9)               | 576.1 (a, 20.5)  | 605.3(b,52.3)               | 608.3 (b, 53.4)    |
| 617.7(a,24.4)               | 637.7 (a, 7.6)   | 614.0(b,17.2)               | 636.4 (a, 3.7)     |
| 664.5(a,218.2)              | 678.5(a,276.1)   | 616.8(a,2.3)                | 637.9 (b, 9.7)     |
| 1660.0(a,480.4)             | 1715.4(a,627.8)  | 1822.1(b,1968.7)            | 1882.4 (b, 2544.4) |
| 1813.5(a,1063.8)            | 1878.0(a,1457.1) | 1826.2(a,39.3)              | 1885.5 (a, 47.1)   |
| 1989.8(a,44.0)              | 2075.8(a,139.3)  | 1880.9(a,385.2)             | 1968.2 (a, 446.6)  |
| 1999.7(a,769.9)             | 2092.0(a,796.4)  | 1989.4(b,107.5)             | 2083.1 (b, 140.2)  |
| 2007.4(a,907.7)             | 2098.8(a,1048.3) | 2005.7(a,1121.2)            | 2098.1 (a, 1282.3) |
| 2022.9(a,1375.0)            | 2112.1(a,1606.2) | 2023.8(b,1403.2)            | 2114.6 (b, 1607.0) |
| 2060.4(a,266.2)             | 2152.4(a,310.9)  | 2051.1(a,4.2)               | 2143.5 (a, 3.8)    |



**Table S6.** Theoretical harmonic vibrational frequencies (in  $\text{cm}^{-1}$ ) for the structures of  $\text{Co}_2(\text{NO})_2(\text{CO})_5$ .



| <b>25S-3(C<sub>2v</sub>)</b>   |                                 | <b>25S-4(C<sub>s</sub>)</b> |                      |
|--------------------------------|---------------------------------|-----------------------------|----------------------|
| BP86                           | B3LYP                           | BP86                        | B3LYP                |
| 5.9(b <sub>1</sub> ,0.0)       | 6.0 (b <sub>1</sub> , 0.0)      | -19.4(a'',0.0)              | -26.0 (a'', 0.0)     |
| 9.3(a <sub>2</sub> ,0.0)       | 11.8 (a <sub>2</sub> , 0.0)     | 14.8(a'',0.0)               | 9.6 (a'', 0.0)       |
| 61.3(b <sub>2</sub> ,0.2)      | 61.5 (b <sub>2</sub> , 0.0)     | 57.0(a',0.0)                | 56.4 (a', 0.0)       |
| 62.3(b <sub>1</sub> ,0.0)      | 62.1 (b <sub>1</sub> , 0.1)     | 57.2(a',0.0)                | 59.1 (a'', 0.1)      |
| 62.3(a <sub>1</sub> ,0.0)      | 62.9 (a <sub>1</sub> , 0.1)     | 60.3(a'',0.0)               | 59.2 (a', 0.0)       |
| 63.7(a <sub>2</sub> ,0.0)      | 64.5 (a <sub>2</sub> , 0.0)     | 66.5(a'',0.0)               | 65.8 (a'', 0.0)      |
| 77.4(a <sub>1</sub> ,0.1)      | 78.8 (a <sub>1</sub> , 0.1)     | 69.1(a',0.0)                | 68.7 (a', 0.1)       |
| 84.9(a <sub>1</sub> ,0.0)      | 89.2 (b <sub>1</sub> , 0.1)     | 73.4(a',0.1)                | 73.7 (a', 0.3)       |
| 86.7(b <sub>1</sub> ,0.0)      | 89.4 (b <sub>2</sub> , 1.1)     | 79.9(a'',0.0)               | 81.5 (a'', 0.1)      |
| 88.9(b <sub>2</sub> ,0.1)      | 91.9 (a <sub>1</sub> , 0.1)     | 80.9(a',0.0)                | 82.6 (a', 0.1)       |
| 91.6(a <sub>2</sub> ,0.0)      | 92.0 (b <sub>2</sub> , 0.1)     | 91.3(a',0.2)                | 92.0 (a', 0.4)       |
| 92.0(b <sub>2</sub> ,0.2)      | 92.3 (a <sub>2</sub> , 0.0)     | 92.7(a'',0.1)               | 94.7 (a'', 0.1)      |
| 173.5(a <sub>1</sub> ,0.0)     | 162.2 (a <sub>1</sub> , 0.5)    | 186.9(a',0.9)               | 179.6 (a', 5.7)      |
| 239.8(b <sub>2</sub> ,9.7)     | 229.8 (b <sub>2</sub> , 20.2)   | 235.0(a',13.0)              | 225.7 (a', 10.9)     |
| 294.7(a <sub>2</sub> ,0.0)     | 302.1 (b <sub>1</sub> , 0.2)    | 282.7(a'',0.0)              | 291.3 (a'', 0.0)     |
| 295.8(b <sub>1</sub> ,0.0)     | 302.2 (a <sub>2</sub> , 0.0)    | 310.9(a'',1.2)              | 307.8 (a'', 2.5)     |
| 338.3(b <sub>2</sub> ,24.9)    | 327.9 (b <sub>2</sub> , 46.4)   | 333.6(a'',0.0)              | 334.3 (a'', 0.0)     |
| 345.6(b <sub>1</sub> ,0.1)     | 345.8 (b <sub>1</sub> , 0.4)    | 342.9(a',4.0)               | 345.4 (a', 7.8)      |
| 361.0(a <sub>1</sub> ,0.0)     | 347.7 (a <sub>1</sub> , 1.1)    | 370.1(a'',0.1)              | 372.3 (a'', 0.1)     |
| 378.7(a <sub>2</sub> ,0.0)     | 380.3 (a <sub>2</sub> , 0.0)    | 378.7(a',14.2)              | 374.1 (a', 23.1)     |
| 417.7(a <sub>1</sub> ,11.2)    | 416.9 (a <sub>1</sub> , 12.4)   | 421.3(a',16.5)              | 403.3 (a', 11.0)     |
| 450.7(b <sub>2</sub> ,48.0)    | 431.5 (b <sub>2</sub> , 43.3)   | 432.4(a'',3.9)              | 414.7 (a'', 4.7)     |
| 459.7(a <sub>1</sub> ,1.0)     | 441.7 (a <sub>1</sub> , 2.4)    | 438.5(a',48.5)              | 418.3 (a', 26.5)     |
| 460.1(b <sub>1</sub> ,3.6)     | 443.4 (b <sub>1</sub> , 26.4)   | 447.3(a',42.7)              | 442.2 (a', 48.4)     |
| 478.0(b <sub>2</sub> ,89.2)    | 464.8 (b <sub>2</sub> , 137.0)  | 469.1(a',12.0)              | 444.9 (a'', 46.7)    |
| 492.7(a <sub>1</sub> ,32.9)    | 467.5 (a <sub>2</sub> , 0.0)    | 471.1(a'',31.1)             | 456.9 (a', 8.6)      |
| 494.4(a <sub>2</sub> ,0.0)     | 490.7 (a <sub>1</sub> , 40.0)   | 481.0(a',18.9)              | 467.2 (a'', 0.0)     |
| 505.2(b <sub>2</sub> ,243.4)   | 498.8 (b <sub>2</sub> , 149.8)  | 485.7(a'',1.1)              | 482.0 (a', 26.6)     |
| 524.9(b <sub>1</sub> ,76.2)    | 524.6 (b <sub>1</sub> , 62.4)   | 513.2(a',9.1)               | 500.9 (a', 34.3)     |
| 551.0(a <sub>1</sub> ,15.5)    | 556.9 (a <sub>1</sub> , 25.0)   | 536.6(a',142.8)             | 543.5 (a', 61.1)     |
| 566.7(b <sub>1</sub> ,30.3)    | 581.9 (b <sub>1</sub> , 34.9)   | 539.5(a',28.9)              | 552.6 (a', 82.8)     |
| 570.1(a <sub>2</sub> ,0.0)     | 583.2 (b <sub>2</sub> , 3.8)    | 548.9(a'',70.5)             | 554.9 (a'', 51.3)    |
| 578.7(b <sub>2</sub> ,0.0)     | 586.3 (a <sub>2</sub> , 0.0)    | 560.9(a'',0.1)              | 578.9 (a'', 10.2)    |
| 588.8(a <sub>1</sub> ,12.0)    | 607.5 (a <sub>1</sub> , 14.1)   | 588.1(a',10.3)              | 614.1 (a', 13.2)     |
| 600.4(b <sub>2</sub> ,19.9)    | 620.5 (b <sub>2</sub> , 7.0)    | 656.2(a',195.3)             | 669.1 (a', 203.3)    |
| 1790.5(b <sub>2</sub> ,97.5)   | 1840.8 (b <sub>2</sub> , 94.5)  | 1666.6(a',479.3)            | 1716.1 (a', 617.2)   |
| 1846.6(a <sub>1</sub> ,1649.5) | 1912.4(a <sub>1</sub> ,2171.8)  | 1818.8(a',659.0)            | 1865.7 (a', 931.2)   |
| 1882.0(a <sub>1</sub> ,20.0)   | 1966.3 (a <sub>1</sub> , 56.4)  | 1994.6(a'',17.8)            | 2087.2 (a'', 241.0)  |
| 1998.3(a <sub>2</sub> ,0.0)    | 2088.0 (a <sub>2</sub> , 0.0)   | 2003.1(a'',1606.9)          | 2098.4 (a', 725.5)   |
| 2004.9(b <sub>1</sub> ,1628.4) | 2093.8(b <sub>1</sub> ,1874.2)  | 2003.4(a',627.0)            | 2098.5 (a'', 1570.7) |
| 2028.1(b <sub>2</sub> ,1066.5) | 2117.5(b <sub>2</sub> ,1202.8)  | 2025.3(a',1355.6)           | 2116.0 (a', 1539.5)  |
| 2055.2(a <sub>1</sub> ,202.6)  | 2147.2 (a <sub>1</sub> , 258.9) | 2058.5(a',56.3)             | 2152.5 (a', 72.1)    |



**Table S7.** Theoretical harmonic vibrational frequencies (in  $\text{cm}^{-1}$ ) for the structures of  $\text{Co}_2(\text{NO})_2(\text{CO})_5$ .

| <b>25S-5(C<sub>s</sub>)</b> |                     | <b>25S-6(C<sub>s</sub>)</b> |                     |
|-----------------------------|---------------------|-----------------------------|---------------------|
| BP86                        | B3LYP               | BP86                        | B3LYP               |
| -14.9(a",0.0)               | -11.7 (a", 0.0)     | 19.6(a",0.1)                | 21.9 (a", 0.0)      |
| 11.3(a",0.0)                | 21.0 (a", 0.0)      | 36.3(a",0.0)                | 39.8 (a', 0.0)      |
| 54.8(a',0.0)                | 53.5 (a', 0.1)      | 52.2(a',0.1)                | 41.4 (a", 0.0)      |
| 62.2(a",0.0)                | 61.9 (a", 0.1)      | 55.3(a',0.0)                | 47.7 (a", 0.0)      |
| 63.3(a',0.0)                | 63.6 (a', 0.0)      | 61.1(a",0.0)                | 49.5 (a', 0.1)      |
| 73.1(a',0.2)                | 73.6 (a', 0.2)      | 65.4(a',0.2)                | 61.6 (a', 0.2)      |
| 74.0(a",0.0)                | 77.3 (a", 0.1)      | 81.8(a",0.0)                | 72.2 (a', 0.9)      |
| 85.8(a',0.0)                | 86.2 (a', 0.0)      | 86.3(a',0.0)                | 75.0 (a", 0.0)      |
| 87.7(a",0.0)                | 90.5 (a', 0.2)      | 89.1(a",0.0)                | 80.7 (a", 0.1)      |
| 90.3(a',0.1)                | 91.7 (a", 0.1)      | 94.9(a',0.3)                | 81.6 (a', 0.1)      |
| 93.0(a',0.0)                | 94.3 (a', 0.5)      | 108.5(a",0.2)               | 92.3 (a', 0.0)      |
| 97.6(a",0.0)                | 99.3 (a", 0.0)      | 179.4(a',6.8)               | 92.4 (a", 0.1)      |
| 178.7(a',1.9)               | 176.0 (a', 4.8)     | 212.8(a',0.4)               | 104.1 (a', 1.1)     |
| 249.9(a',10.6)              | 248.1 (a', 8.0)     | 222.6(a',0.3)               | 171.6 (a', 0.2)     |
| 282.9(a",0.0)               | 291.6 (a", 0.0)     | 266.8(a",1.7)               | 285.1 (a", 0.7)     |
| 308.4(a",0.0)               | 313.7 (a", 0.0)     | 271.9(a',0.6)               | 336.5 (a", 0.0)     |
| 325.5(a",0.1)               | 329.6 (a", 0.9)     | 325.1(a",0.1)               | 346.0 (a', 2.5)     |
| 330.5(a',9.5)               | 334.1 (a', 10.2)    | 347.2(a",0.2)               | 350.0 (a", 5.9)     |
| 369.1(a",0.0)               | 373.9 (a", 0.0)     | 361.9(a",0.7)               | 382.7 (a', 9.4)     |
| 372.5(a',13.5)              | 376.6 (a', 11.2)    | 384.3(a',20.3)              | 389.3 (a", 6.2)     |
| 437.8(a',8.2)               | 416.3 (a', 11.5)    | 408.6(a',6.9)               | 408.0 (a', 31.1)    |
| 446.6(a',27.6)              | 427.2 (a', 26.3)    | 432.5(a',17.1)              | 435.1 (a', 19.4)    |
| 458.0(a',2.1)               | 440.1 (a", 22.3)    | 438.0(a",2.6)               | 464.5 (a', 20.4)    |
| 460.5(a",2.6)               | 440.7 (a', 0.6)     | 453.4(a',3.0)               | 466.9 (a", 15.2)    |
| 478.1(a',5.4)               | 453.4 (a", 11.4)    | 461.4(a",2.0)               | 473.0 (a", 29.3)    |
| 478.3(a",15.2)              | 465.3 (a', 3.7)     | 474.9(a',2.0)               | 474.4 (a', 14.4)    |
| 486.9(a',32.9)              | 485.1 (a', 28.3)    | 516.9(a",7.0)               | 496.4 (a', 1.2)     |
| 499.8(a',49.9)              | 504.6 (a', 56.9)    | 525.7(a',117.1)             | 500.5 (a", 1.5)     |
| 518.8(a",6.3)               | 522.3 (a", 9.9)     | 540.2(a",56.4)              | 548.8 (a', 214.5)   |
| 529.7(a',42.0)              | 530.9 (a', 37.5)    | 547.4(a',89.0)              | 555.9 (a', 51.8)    |
| 542.7(a',131.8)             | 559.5 (a', 107.7)   | 555.2(a',10.0)              | 557.2 (a", 40.5)    |
| 555.5(a",80.1)              | 563.0 (a", 39.6)    | 591.2(a',8.2)               | 568.3 (a', 4.4)     |
| 558.9(a",6.1)               | 575.2 (a", 37.5)    | 610.1(a',309.1)             | 598.8 (a', 44.1)    |
| 592.3(a',5.4)               | 615.9 (a', 1.9)     | 624.3(a",0.0)               | 654.0 (a", 1.9)     |
| 665.3(a',236.3)             | 679.9 (a', 249.9)   | 636.5(a',3.3)               | 655.8 (a', 47.7)    |
| 1657.4(a',450.8)            | 1702.9 (a', 538.4)  | 1812.2(a",1071.3)           | 1884.6(a", 1345.7)  |
| 1816.3(a',618.5)            | 1858.3 (a', 869.2)  | 1839.7(a',751.0)            | 1918.2 (a', 972.2)  |
| 1995.8(a",107.1)            | 2085.6 (a", 214.8)  | 1875.1(a',902.8)            | 2058.8 (a', 807.4)  |
| 2001.1(a',704.2)            | 2092.1(a", 1725.4)  | 1904.6(a',373.5)            | 2058.9(a", 1190.3)  |
| 2002.0(a",1539.3)           | 2098.9 (a', 748.8)  | 2001.2(a",921.8)            | 2075.6 (a', 268.9)  |
| 2025.8(a',1411.0)           | 2116.6 (a', 1579.5) | 2011.7(a',547.0)            | 2111.9 (a', 1425.9) |
| 2057.1(a',23.7)             | 2151.4 (a', 43.9)   | 2057.9(a',538.4)            | 2148.1 (a', 286.9)  |



**Table S8.** Theoretical harmonic vibrational frequencies (in  $\text{cm}^{-1}$ ) for the structures of  $\text{Co}_2(\text{NO})_2(\text{CO})_5$ .

| <b>25S-7(C<sub>s</sub>)</b> |                     | <b>25T-1(C<sub>1</sub>)</b> |                    |
|-----------------------------|---------------------|-----------------------------|--------------------|
| BP86                        | B3LYP               | BP86                        | B3LYP              |
| 11.6(a'',0.0)               | 9.7 (a'', 0.0)      | 15.8(a,0.1)                 | 19.2 (a, 0.1)      |
| 12.3(a',0.0)                | 20.9 (a', 0.0)      | 28.0(a,0.1)                 | 26.9 (a, 0.0)      |
| 44.5(a'',0.0)               | 50.8 (a'', 0.1)     | 52.3(a,0.1)                 | 51.3 (a, 0.1)      |
| 51.7(a',0.1)                | 52.1 (a', 0.2)      | 58.7(a,0.4)                 | 57.1 (a, 0.8)      |
| 61.4(a',1.2)                | 58.9 (a', 1.1)      | 63.2(a,0.1)                 | 59.3 (a, 0.3)      |
| 66.8(a',0.2)                | 68.0 (a', 0.3)      | 66.2(a,0.1)                 | 62.6 (a, 0.1)      |
| 70.8(a'',0.3)               | 75.4 (a'', 0.6)     | 68.0(a,0.0)                 | 67.8 (a, 0.0)      |
| 75.3(a'',0.1)               | 79.3 (a'', 0.3)     | 73.2(a,0.1)                 | 69.9 (a, 0.1)      |
| 78.9(a',0.6)                | 85.5 (a'', 0.1)     | 74.6(a,0.1)                 | 70.8 (a, 0.3)      |
| 80.1(a'',0.0)               | 86.4 (a', 0.8)      | 82.3(a,0.3)                 | 81.7 (a, 1.0)      |
| 90.9(a',0.5)                | 96.5 (a', 0.4)      | 88.6(a,0.1)                 | 85.9 (a, 0.1)      |
| 100.5(a'',0.0)              | 105.6 (a'', 0.1)    | 96.1(a,0.4)                 | 95.7 (a, 0.1)      |
| 124.4(a',3.4)               | 128.9 (a', 4.3)     | 160.7(a,0.1)                | 141.1 (a, 3.9)     |
| 166.3(a',0.0)               | 165.3 (a', 0.0)     | 236.2(a,1.2)                | 234.5 (a, 0.8)     |
| 274.1(a'',0.6)              | 294.5 (a'', 0.0)    | 249.2(a,0.4)                | 252.3 (a, 6.7)     |
| 316.2(a',0.0)               | 324.7 (a', 0.3)     | 279.8(a,0.2)                | 270.1 (a, 0.8)     |
| 333.7(a'',3.2)              | 345.2 (a'', 0.1)    | 295.4(a,0.2)                | 273.4 (a, 1.5)     |
| 343.1(a'',0.1)              | 351.8 (a'', 4.0)    | 323.0(a,2.0)                | 315.7 (a, 3.9)     |
| 363.7(a',13.1)              | 374.1 (a', 16.0)    | 347.0(a,5.3)                | 331.4 (a, 35.7)    |
| 386.3(a'',7.6)              | 400.1 (a'', 8.3)    | 368.6(a,1.6)                | 346.2 (a, 26.5)    |
| 436.9(a',23.4)              | 419.2 (a', 50.5)    | 390.3(a,9.2)                | 365.1 (a, 31.1)    |
| 459.8(a',16.1)              | 441.2 (a', 11.4)    | 413.1(a,3.5)                | 369.9 (a, 8.4)     |
| 465.0(a',1.4)               | 449.0 (a', 12.9)    | 415.8(a,4.3)                | 392.5 (a, 12.2)    |
| 470.5(a',5.1)               | 454.5 (a', 1.0)     | 432.6(a,20.6)               | 399.7 (a, 4.1)     |
| 480.5(a'',16.9)             | 481.1 (a'', 24.6)   | 435.9(a,1.8)                | 408.7 (a, 9.5)     |
| 498.5(a',9.0)               | 488.9 (a', 18.3)    | 446.6(a,8.3)                | 425.0 (a, 5.0)     |
| 515.0(a'',7.3)              | 516.7 (a'', 0.1)    | 453.8(a,3.3)                | 435.5 (a, 7.1)     |
| 526.1(a'',0.1)              | 537.6 (a'', 0.1)    | 467.0(a,13.0)               | 444.4 (a, 43.9)    |
| 552.9(a',83.3)              | 550.1 (a'', 50.6)   | 473.3(a,6.9)                | 450.5 (a, 5.0)     |
| 555.6(a'',39.7)             | 559.4 (a', 169.0)   | 474.2(a,35.2)               | 456.7 (a, 1.5)     |
| 560.2(a',76.2)              | 571.3 (a', 70.8)    | 484.4(a,36.8)               | 466.3 (a, 26.0)    |
| 563.5(a',99.8)              | 573.5 (a', 21.2)    | 502.6(a,34.8)               | 474.1 (a, 40.5)    |
| 591.8(a',43.8)              | 601.6 (a', 78.9)    | 514.0(a,41.0)               | 499.7 (a, 50.4)    |
| 629.3(a',47.5)              | 650.0 (a', 63.8)    | 535.0(a,57.0)               | 525.2 (a, 50.3)    |
| 636.0(a'',0.1)              | 656.1 (a'', 0.6)    | 603.5(a,79.2)               | 606.4 (a, 136.5)   |
| 1822.2(a'',727.4)           | 1873.4(a'', 1056.2) | 1610.9(a,540.3)             | 1628.0 (a, 617.1)  |
| 1849.3(a',891.1)            | 1907.2 (a', 1233.6) | 1729.0(a,760.0)             | 1783.8 (a, 983.3)  |
| 1973.0(a'',1232.2)          | 2060.5(a'', 1464.7) | 1992.6(a,5.1)               | 2075.4 (a, 429.5)  |
| 1986.5(a',97.4)             | 2073.0 (a', 18.8)   | 1999.6(a,732.7)             | 2098.5 (a, 1041.7) |
| 1992.6(a',728.4)            | 2076.9 (a', 871.8)  | 2005.6(a,1180.1)            | 2106.8 (a, 956.4)  |
| 2018.6(a',1040.3)           | 2102.2 (a', 1372.3) | 2023.3(a,1681.0)            | 2114.5 (a, 1680.4) |
| 2056.7(a',252.3)            | 2146.0 (a', 306.1)  | 2054.6(a,109.4)             | 2152.8 (a, 242.9)  |





**Table S9.** Theoretical harmonic vibrational frequencies (in  $\text{cm}^{-1}$ ) for the structures of  $\text{Co}_2(\text{NO})_2(\text{CO})_4$ .

| <b>24S-1(C<sub>s</sub>)</b> |                     | <b>24S-2(C<sub>1</sub>)</b> |                    |
|-----------------------------|---------------------|-----------------------------|--------------------|
| BP86                        | B3LYP               | BP86                        | B3LYP              |
| 22.9(a',0.2)                | 17.4 (a', 0.1)      | 17.5(a,0.2)                 | 16.2 (a, 0.1)      |
| 26.0(a',0.2)                | 23.7 (a'', 1.3)     | 39.7(a,1.0)                 | 34.3 (a, 0.1)      |
| 45.7(a'',0.0)               | 43.7 (a'', 0.0)     | 44.1(a,0.0)                 | 44.1 (a, 0.9)      |
| 54.4(a',0.1)                | 53.5 (a', 0.3)      | 54.6(a,0.2)                 | 56.5 (a, 0.2)      |
| 58.0(a',0.1)                | 54.0 (a'', 0.3)     | 61.8(a,0.0)                 | 58.5 (a, 0.2)      |
| 61.1(a'',0.5)               | 62.2 (a', 0.3)      | 62.7(a,0.2)                 | 63.3 (a, 0.4)      |
| 67.5(a'',0.1)               | 72.1 (a'', 0.0)     | 74.9(a,0.1)                 | 74.7 (a, 0.3)      |
| 74.2(a',0.3)                | 72.6 (a', 0.2)      | 78.9(a,0.2)                 | 80.7 (a, 0.1)      |
| 89.8(a'',0.3)               | 86.1 (a', 0.1)      | 92.9(a,0.1)                 | 92.3 (a, 0.0)      |
| 156.3(a'',0.7)              | 138.2 (a'', 3.0)    | 158.2(a,0.7)                | 131.4 (a, 0.3)     |
| 210.0(a'',0.1)              | 139.6 (a', 1.3)     | 203.1(a,0.6)                | 181.3 (a, 0.9)     |
| 214.1(a',0.4)               | 203.1 (a', 0.9)     | 207.3(a,0.2)                | 211.6 (a, 0.4)     |
| 247.0(a',2.4)               | 209.4 (a'', 0.0)    | 241.0(a,0.9)                | 216.6 (a, 5.2)     |
| 252.5(a'',0.0)              | 213.3 (a', 20.5)    | 263.4(a,1.9)                | 265.8 (a, 4.0)     |
| 288.9(a'',0.3)              | 253.8 (a'', 3.1)    | 283.0(a,0.2)                | 297.5 (a, 20.2)    |
| 291.9(a',0.1)               | 298.6 (a', 0.1)     | 296.0(a,0.3)                | 304.9 (a, 1.8)     |
| 353.7(a'',0.9)              | 333.6 (a', 6.0)     | 341.4(a,0.7)                | 336.0 (a, 40.2)    |
| 375.3(a',2.1)               | 349.5 (a'', 0.1)    | 374.5(a,8.8)                | 358.6 (a, 0.4)     |
| 386.6(a'',2.4)              | 370.3 (a', 0.5)     | 399.3(a,3.9)                | 382.3 (a, 24.2)    |
| 388.2(a',2.3)               | 376.0 (a'', 9.2)    | 415.9(a,2.2)                | 416.0 (a, 5.0)     |
| 399.9(a',2.8)               | 427.4 (a'', 0.4)    | 442.2(a,5.8)                | 436.6 (a, 5.2)     |
| 445.2(a',1.3)               | 437.8 (a', 0.4)     | 455.2(a,16.8)               | 444.1 (a, 32.2)    |
| 446.6(a'',0.4)              | 439.0 (a'', 3.9)    | 466.5(a,5.5)                | 466.5 (a, 22.9)    |
| 469.3(a'',36.5)             | 447.0 (a', 30.4)    | 490.3(a,27.8)               | 475.2 (a, 40.9)    |
| 489.6(a',40.9)              | 471.6 (a', 67.3)    | 500.9(a,32.6)               | 497.9 (a, 23.9)    |
| 524.1(a',8.0)               | 562.4 (a'', 15.5)   | 532.7(a,16.6)               | 572.7 (a, 15.6)    |
| 563.6(a'',12.1)             | 579.6 (a', 13.3)    | 553.5(a,27.9)               | 580.7 (a, 44.2)    |
| 585.5(a',1.7)               | 600.1 (a', 1.0)     | 566.8(a,0.6)                | 591.3 (a, 1.0)     |
| 615.2(a'',2.1)              | 640.9 (a', 1.9)     | 619.6(a,9.2)                | 645.5 (a, 9.2)     |
| 625.6(a',11.0)              | 652.8 (a', 10.9)    | 625.4(a,0.1)                | 649.9 (a, 0.4)     |
| 1812.8(a'',1591.4)          | 1873.8 (a', 1805.6) | 1805.0(a,2221.9)            | 1867.1 (a, 2129.3) |
| 1824.2(a',706.9)            | 1891.4 (a', 1170.5) | 1814.1(a,63.5)              | 1885.7 (a, 746.0)  |
| 1899.5(a',968.9)            | 2009.2(a'', 1159.6) | 1902.4(a,870.4)             | 2000.3 (a, 677.0)  |
| 1909.5(a',449.8)            | 2017.2 (a', 428.7)  | 1913.5(a,115.2)             | 2031.9 (a, 509.1)  |
| 1994.9(a'',764.8)           | 2090.0 (a', 755.0)  | 2003.0(a,1808.5)            | 2099.7 (a, 1814.9) |
| 2030.9(a',707.1)            | 2126.5 (a', 795.9)  | 2029.0(a,9.7)               | 2125.9 (a, 46.3)   |

**Table S10.** Theoretical harmonic vibrational frequencies (in  $\text{cm}^{-1}$ ) for the structures of  $\text{Co}_2(\text{NO})_2(\text{CO})_4$ .

| <b>24S-3(C<sub>1</sub>)</b> |                    | <b>24S-4</b>                   |                                 |
|-----------------------------|--------------------|--------------------------------|---------------------------------|
| BP86                        | B3LYP              | BP86                           | B3LYP                           |
| 29.0(a,0.1)                 | 21.8 (a, 0.2)      | 29.8(b <sub>u</sub> ,0.1)      | 12.9 (a <sub>2</sub> , 0.0)     |
| 43.2(a,0.3)                 | 25.2 (a, 0.1)      | 34.9(a <sub>u</sub> ,0.4)      | 31.7 (b <sub>1</sub> , 0.1)     |
| 52.3(a,0.4)                 | 50.4 (a, 0.1)      | 60.6(b <sub>u</sub> ,0.5)      | 54.0 (b <sub>2</sub> , 1.4)     |
| 64.5(a,0.2)                 | 58.4 (a, 1.0)      | 67.8(a <sub>g</sub> ,0.0)      | 57.3 (a <sub>2</sub> , 0.0)     |
| 67.9(a,0.1)                 | 62.8 (a, 0.8)      | 78.2(a <sub>g</sub> ,0.0)      | 74.2 (a <sub>1</sub> , 0.0)     |
| 76.1(a,0.2)                 | 74.7 (a, 0.1)      | 81.7(a <sub>u</sub> ,0.2)      | 84.6 (b <sub>1</sub> , 0.8)     |
| 77.0(a,0.1)                 | 79.6 (a, 0.1)      | 94.3(b <sub>g</sub> ,0.0)      | 86.0 (b <sub>2</sub> , 0.6)     |
| 88.0(a,0.2)                 | 90.6 (a, 0.3)      | 97.3(b <sub>u</sub> ,0.7)      | 95.2 (a <sub>1</sub> , 0.1)     |
| 93.9(a,0.1)                 | 94.2 (a, 0.1)      | 101.8(b <sub>g</sub> ,0.0)     | 114.5 (b <sub>1</sub> , 1.1)    |
| 199.0(a,0.3)                | 98.2 (a, 0.0)      | 221.0(a <sub>g</sub> ,0.0)     | 158.4 (b <sub>2</sub> , 5.8)    |
| 214.7(a,3.4)                | 190.0 (a, 6.2)     | 221.6(a <sub>u</sub> ,0.8)     | 211.6 (a <sub>1</sub> , 2.6)    |
| 231.4(a,0.3)                | 247.6 (a, 0.4)     | 270.2(b <sub>g</sub> ,0.0)     | 234.9 (a <sub>1</sub> , 0.1)    |
| 273.7(a,0.2)                | 291.3 (a, 1.2)     | 275.4(a <sub>u</sub> ,0.5)     | 293.0 (a <sub>2</sub> , 0.0)    |
| 316.2(a,4.3)                | 315.9 (a, 0.5)     | 323.8(b <sub>u</sub> ,0.9)     | 314.5 (b <sub>2</sub> , 0.0)    |
| 321.4(a,0.4)                | 326.1 (a, 5.8)     | 331.7(a <sub>g</sub> ,0.0)     | 342.1 (b <sub>1</sub> , 0.1)    |
| 334.3(a,2.2)                | 339.3 (a, 1.0)     | 347.6(b <sub>g</sub> ,0.0)     | 378.6 (a <sub>2</sub> , 0.0)    |
| 387.8(a,1.0)                | 405.3 (a, 3.1)     | 410.2(b <sub>u</sub> ,7.8)     | 437.0 (a <sub>1</sub> , 42.4)   |
| 397.2(a,1.1)                | 413.2 (a, 22.2)    | 429.5(b <sub>g</sub> ,0.0)     | 448.3 (b <sub>2</sub> , 1.1)    |
| 434.8(a,7.1)                | 427.9 (a, 5.2)     | 441.5(a <sub>g</sub> ,0.0)     | 455.8 (b <sub>1</sub> , 3.8)    |
| 440.9(a,1.3)                | 434.8 (a, 22.2)    | 456.3(a <sub>u</sub> ,0.6)     | 462.5 (b <sub>2</sub> , 44.8)   |
| 447.0(a,12.9)               | 468.5 (a, 15.6)    | 464.6(b <sub>u</sub> ,6.9)     | 474.0 (a <sub>1</sub> , 15.1)   |
| 458.3(a,13.7)               | 478.0 (a, 10.2)    | 468.9(a <sub>g</sub> ,0.0)     | 482.6 (b <sub>1</sub> , 19.1)   |
| 476.1(a,19.6)               | 478.9 (a, 13.9)    | 477.7(b <sub>g</sub> ,0.0)     | 488.8 (a <sub>1</sub> , 28.2)   |
| 480.3(a,10.3)               | 489.2 (a, 15.0)    | 484.7(b <sub>u</sub> ,34.3)    | 503.2 (a <sub>1</sub> , 3.3)    |
| 528.4(a,28.7)               | 533.4 (a, 16.9)    | 515.7(a <sub>u</sub> ,59.6)    | 538.7 (a <sub>2</sub> , 0.0)    |
| 532.5(a,11.0)               | 561.1 (a, 76.9)    | 524.1(a <sub>g</sub> ,0.0)     | 556.9 (b <sub>1</sub> , 53.3)   |
| 541.1(a,33.3)               | 580.8 (a, 62.4)    | 548.9(b <sub>u</sub> ,87.6)    | 562.7 (b <sub>2</sub> , 58.7)   |
| 550.1(a,34.8)               | 593.9 (a, 47.3)    | 564.6(a <sub>g</sub> ,0.0)     | 592.9 (a <sub>1</sub> , 36.0)   |
| 606.5(a,39.9)               | 636.8 (a, 19.2)    | 577.2(b <sub>g</sub> ,0.0)     | 625.1 (b <sub>2</sub> , 0.2)    |
| 644.3(a,8.4)                | 708.4 (a, 190.9)   | 601.9(a <sub>u</sub> ,90.2)    | 667.8 (a <sub>1</sub> , 182.1)  |
| 1649.1(a,591.3)             | 1696.8 (a, 595.4)  | 1640.5(b <sub>u</sub> ,1059.2) | 1693.1(b <sub>2</sub> , 239.8)  |
| 1826.2(a,1193.8)            | 1899.7 (a, 1685.8) | 1671.4(a <sub>g</sub> ,0.0)    | 1729.7 (a <sub>1</sub> , 0.5)   |
| 1912.9(a,569.1)             | 2051.7 (a, 674.7)  | 1987.6(b <sub>g</sub> ,0.0)    | 2093.5 (b <sub>2</sub> , 784.8) |
| 1987.7(a,459.4)             | 2083.4 (a, 750.6)  | 1996.4(b <sub>u</sub> ,1550.2) | 2097.5 (b <sub>1</sub> , 931.9) |
| 2007.7(a,1591.6)            | 2100.5 (a, 1404.5) | 2014.9(a <sub>u</sub> ,1984.1) | 2116.4(a <sub>1</sub> , 217.4)  |
| 2041.7(a,405.2)             | 2140.4 (a, 579.0)  | 2044.5(a <sub>g</sub> ,0.0)    | 2148.3 (a <sub>1</sub> , 0.2)   |

**Table S11.** Theoretical harmonic vibrational frequencies (in  $\text{cm}^{-1}$ ) for the structures of  $\text{Co}_2(\text{NO})_2(\text{CO})_4$ .

| <b>24S-5(C<sub>2v</sub>)</b>   |                                  |
|--------------------------------|----------------------------------|
| BP86                           | B3LYP                            |
| 27.6(b <sub>2</sub> ,0.2)      | 25.0 (b <sub>2</sub> , 0.2)      |
| 40.9(a <sub>2</sub> ,0.0)      | 38.1 (a <sub>2</sub> , 0.0)      |
| 48.6(b <sub>1</sub> ,0.7)      | 43.1 (b <sub>1</sub> , 1.4)      |
| 53.0(a <sub>1</sub> ,0.1)      | 51.5 (a <sub>1</sub> , 0.3)      |
| 59.9(a <sub>2</sub> ,0.0)      | 56.1 (a <sub>2</sub> , 0.0)      |
| 65.5(a <sub>1</sub> ,0.0)      | 65.6 (a <sub>1</sub> , 0.1)      |
| 70.4(b <sub>1</sub> ,0.4)      | 68.7 (b <sub>1</sub> , 1.1)      |
| 74.0(b <sub>2</sub> ,0.4)      | 78.5 (b <sub>2</sub> , 0.5)      |
| 90.4(b <sub>2</sub> ,0.3)      | 91.5 (b <sub>2</sub> , 0.6)      |
| 186.2(a <sub>1</sub> ,0.6)     | 179.4 (b <sub>1</sub> , 5.7)     |
| 206.5(b <sub>1</sub> ,1.5)     | 195.2 (a <sub>1</sub> , 2.6)     |
| 225.9(a <sub>1</sub> ,2.8)     | 224.8 (a <sub>1</sub> , 6.5)     |
| 226.5(b <sub>2</sub> ,1.6)     | 238.5 (a <sub>2</sub> , 0.0)     |
| 238.3(a <sub>2</sub> ,0.0)     | 265.8 (b <sub>2</sub> , 3.6)     |
| 310.2(b <sub>1</sub> ,2.9)     | 280.9 (b <sub>1</sub> , 3.9)     |
| 333.6(b <sub>2</sub> ,0.0)     | 340.1 (b <sub>2</sub> , 0.0)     |
| 339.4(a <sub>2</sub> ,0.0)     | 350.7 (b <sub>1</sub> , 4.6)     |
| 364.1(b <sub>1</sub> ,1.8)     | 353.4 (a <sub>2</sub> , 0.0)     |
| 393.3(a <sub>1</sub> ,1.5)     | 388.8 (a <sub>1</sub> , 7.4)     |
| 408.8(a <sub>2</sub> ,0.0)     | 410.2 (b <sub>2</sub> , 0.6)     |
| 420.5(b <sub>2</sub> ,0.2)     | 418.1 (a <sub>1</sub> , 21.4)    |
| 432.2(b <sub>1</sub> ,3.7)     | 421.5 (a <sub>2</sub> , 0.0)     |
| 434.2(a <sub>1</sub> ,8.0)     | 424.3 (b <sub>1</sub> , 7.6)     |
| 483.9(a <sub>1</sub> ,22.1)    | 479.6 (a <sub>1</sub> , 18.8)    |
| 514.1(b <sub>2</sub> ,49.5)    | 502.9 (b <sub>2</sub> , 64.3)    |
| 568.1(a <sub>1</sub> ,20.8)    | 583.8 (a <sub>1</sub> , 0.0)     |
| 571.6(a <sub>1</sub> ,37.1)    | 593.9 (a <sub>1</sub> , 95.9)    |
| 576.8(b <sub>1</sub> ,28.1)    | 605.2 (b <sub>1</sub> , 46.3)    |
| 623.8(b <sub>2</sub> ,0.0)     | 648.6 (b <sub>2</sub> , 3.0)     |
| 658.3(a <sub>1</sub> ,7.8)     | 674.2 (a <sub>1</sub> , 13.6)    |
| 1823.2(b <sub>2</sub> ,1040.2) | 1887.8 (b <sub>2</sub> , 1516.3) |
| 1850.0(a <sub>1</sub> ,879.2)  | 1928.4 (a <sub>1</sub> , 1112.2) |
| 1869.4(b <sub>1</sub> ,935.9)  | 1945.0 (b <sub>1</sub> , 1198.1) |
| 1886.6(a <sub>1</sub> ,671.3)  | 1964.0 (a <sub>1</sub> , 888.2)  |
| 1983.3(b <sub>2</sub> ,1084.2) | 2072.2 (b <sub>2</sub> , 1300.4) |
| 2027.6(a <sub>1</sub> ,585.0)  | 2121.0 (a <sub>1</sub> , 609.8)  |

**Table S12.** Theoretical harmonic vibrational frequencies (in  $\text{cm}^{-1}$ ) for the structures of  $\text{Co}_2(\text{NO})_2(\text{CO})_3$ .

| <b>23S-1(D<sub>3h</sub>)</b>     |                                  | <b>23S-2(C<sub>s</sub>)</b> |                     |
|----------------------------------|----------------------------------|-----------------------------|---------------------|
| BP86                             | B3LYP                            | BP86                        | B3LYP               |
| 50.6(e',0.1)                     | 50.6 (e', 0.4)                   | 18.7(a'',0.1)               | 18.4 (a'', 0.0)     |
| 50.6(e',0.1)                     | 50.6 (e', 0.4)                   | 48.0(a'',0.5)               | 49.8 (a'', 0.1)     |
| 69.3(e'',0.0)                    | 68.2 (e'', 0.0)                  | 54.6(a',0.7)                | 56.6 (a', 0.5)      |
| 69.3(e'',0.0)                    | 68.2 (e'', 0.0)                  | 57.8(a'',0.3)               | 65.5 (a', 0.1)      |
| 85.3(e',0.6)                     | 86.1 (e', 0.7)                   | 64.5(a',0.1)                | 69.0 (a'', 0.5)     |
| 85.3(e',0.6)                     | 86.1 (e', 0.7)                   | 69.8(a',0.1)                | 74.4 (a', 0.1)      |
| 161.0(a <sub>2</sub> '',0.0)     | 136.0 (e'', 0.0)                 | 97.1(a'',0.3)               | 98.7 (a'', 0.6)     |
| 196.3(e'',0.0)                   | 136.0 (e'', 0.0)                 | 159.5(a',0.2)               | 127.3 (a', 0.2)     |
| 196.3(e'',0.0)                   | 154.8 (a <sub>2</sub> '', 1.1)   | 226.1(a',2.4)               | 222.1 (a', 2.5)     |
| 268.1(e'',0.0)                   | 246.7 (e'', 0.0)                 | 237.1(a',0.9)               | 238.8 (a', 2.0)     |
| 268.1(e'',0.0)                   | 246.7 (e'', 0.0)                 | 275.6(a',1.6)               | 295.1 (a'', 0.1)    |
| 293.9(a <sub>1</sub> ',0.0)      | 287.9 (a <sub>1</sub> ', 0.0)    | 297.0(a'',0.0)              | 304.8 (a', 11.4)    |
| 339.2(a <sub>2</sub> ',0.0)      | 316.0 (a <sub>2</sub> '', 24.8)  | 321.6(a'',0.9)              | 324.9 (a'', 0.9)    |
| 383.6(a <sub>2</sub> '',6.7)     | 338.3 (a <sub>2</sub> '', 0.0)   | 371.6(a'',0.0)              | 371.4 (a'', 0.6)    |
| 393.5(e',9.6)                    | 374.0 (e', 18.2)                 | 390.9(a',3.5)               | 381.1 (a', 5.5)     |
| 393.5(e',9.6)                    | 374.0 (e', 18.2)                 | 425.2(a',4.7)               | 428.4 (a', 3.3)     |
| 406.0(a <sub>1</sub> ',0.0)      | 385.9 (a <sub>1</sub> ', 0.0)    | 433.1(a'',0.0)              | 441.2 (a'', 14.2)   |
| 484.4(e',0.7)                    | 479.3 (e', 2.2)                  | 441.0(a',0.1)               | 452.9 (a', 7.0)     |
| 484.4(e',0.7)                    | 479.3 (e', 2.2)                  | 448.7(a'',1.9)              | 461.6 (a'', 3.3)    |
| 576.6(e'',0.0)                   | 588.3 (e', 11.3)                 | 464.2(a',5.6)               | 468.8 (a', 8.2)     |
| 576.6(e'',0.0)                   | 588.3 (e', 11.3)                 | 493.1(a',28.6)              | 474.3 (a', 28.4)    |
| 580.5(e',10.7)                   | 592.6 (e'', 0.0)                 | 508.5(a'',36.8)             | 510.8 (a'', 33.9)   |
| 580.5(e',10.7)                   | 592.7 (e'', 0.0)                 | 557.7(a',57.2)              | 589.1 (a', 117.1)   |
| 643.3(a <sub>2</sub> '',0.1)     | 670.5 (a <sub>2</sub> '', 1.5)   | 627.1(a',29.8)              | 666.9 (a', 39.7)    |
| 680.1(a <sub>1</sub> ',0.0)      | 702.1 (a <sub>1</sub> ', 0.0)    | 665.9(a',2.8)               | 698.9 (a', 26.5)    |
| 1845.4(a <sub>2</sub> '',2361.4) | 1907.3(a <sub>2</sub> '',3149.2) | 1667.4(a',494.8)            | 1717.5 (a', 615.1)  |
| 1853.9(a <sub>1</sub> ',0.0)     | 1917.4 (a <sub>1</sub> ', 0.0)   | 1836.5(a',1361.1)           | 1899.5 (a', 1838.6) |
| 1921.1(e',969.4)                 | 2025.8 (e', 1137.3)              | 1897.5(a',679.1)            | 2004.3 (a', 754.8)  |
| 1921.1(e',969.4)                 | 2025.8 (e', 1137.3)              | 1995.7(a'',945.3)           | 2093.7(a'', 1067.3) |
| 1966.8(a <sub>1</sub> ',0.0)     | 2070.9 (a <sub>1</sub> ', 0.0)   | 2037.3(a',679.0)            | 2135.3 (a', 777.5)  |

**Table S13.** Theoretical harmonic vibrational frequencies (in  $\text{cm}^{-1}$ ) for the structures of  $\text{Co}_2(\text{NO})_2(\text{CO})_3$ .

| <b>23S-3(C<sub>1</sub>)</b> |                    | <b>23S-4(C<sub>s</sub>)</b> |                     |
|-----------------------------|--------------------|-----------------------------|---------------------|
| BP86                        | B3LYP              | BP86                        | B3LYP               |
| 33.0(a,0.0)                 | 31.5 (a, 0.1)      | 33.6(a",0.1)                | 36.1 (a", 0.0)      |
| 47.8(a,0.1)                 | 44.0 (a, 0.2)      | 43.0(a",0.1)                | 52.5 (a", 0.2)      |
| 54.6(a,0.5)                 | 51.7 (a, 1.4)      | 67.2(a',0.3)                | 69.1 (a', 0.2)      |
| 64.5(a,0.0)                 | 57.6 (a, 1.2)      | 75.1(a',0.0)                | 75.6 (a', 0.0)      |
| 69.9(a,1.5)                 | 64.9 (a, 0.0)      | 76.3(a",0.8)                | 78.3 (a", 1.7)      |
| 78.2(a,0.0)                 | 78.3 (a, 0.0)      | 91.1(a',0.4)                | 93.6 (a', 0.2)      |
| 90.7(a,0.0)                 | 89.9 (a, 0.2)      | 101.2(a",0.6)               | 101.9 (a", 0.5)     |
| 189.1(a,0.4)                | 151.1 (a, 0.7)     | 198.1(a',3.0)               | 222.9 (a', 1.4)     |
| 219.9(a,0.5)                | 182.2 (a, 2.1)     | 241.2(a',3.1)               | 238.0 (a', 0.7)     |
| 234.0(a,1.9)                | 226.1 (a, 0.2)     | 245.7(a',1.0)               | 246.0 (a', 7.9)     |
| 244.1(a,0.2)                | 237.5 (a, 0.5)     | 263.7(a",0.6)               | 282.3 (a", 0.0)     |
| 299.7(a,1.1)                | 238.8 (a, 8.6)     | 319.2(a',0.7)               | 324.2 (a', 2.1)     |
| 323.0(a,0.9)                | 304.4 (a, 0.4)     | 350.8(a",0.4)               | 358.8 (a", 2.2)     |
| 358.9(a,3.2)                | 341.1 (a, 0.8)     | 426.8(a',14.3)              | 429.3 (a', 25.6)    |
| 399.8(a,8.5)                | 379.3 (a, 20.6)    | 440.7(a",0.0)               | 432.3 (a", 10.0)    |
| 424.6(a,10.1)               | 403.6 (a, 14.9)    | 462.0(a',4.7)               | 438.9 (a', 6.3)     |
| 455.6(a,9.9)                | 453.6 (a, 14.0)    | 465.1(a",0.1)               | 457.2 (a", 7.8)     |
| 462.4(a,0.0)                | 459.8 (a, 0.7)     | 486.6(a',17.6)              | 486.2 (a", 23.3)    |
| 483.7(a,38.4)               | 463.9 (a, 48.1)    | 498.1(a",39.9)              | 489.0 (a', 28.7)    |
| 492.6(a,25.0)               | 472.5 (a, 24.2)    | 504.8(a',85.7)              | 495.5 (a', 96.9)    |
| 513.6(a,2.3)                | 533.0 (a, 17.0)    | 520.5(a",15.3)              | 535.0 (a', 18.7)    |
| 544.4(a,24.9)               | 547.4 (a, 11.8)    | 536.1(a',36.8)              | 543.2 (a", 20.7)    |
| 553.4(a,36.5)               | 574.9 (a, 30.9)    | 568.4(a',6.8)               | 586.6 (a', 8.2)     |
| 616.0(a,5.8)                | 642.8 (a, 7.5)     | 623.7(a',13.9)              | 649.3 (a', 5.5)     |
| 654.0(a,0.3)                | 682.9 (a, 0.7)     | 654.4(a',151.8)             | 670.5 (a', 175.7)   |
| 1823.1(a,1906.1)            | 1885.8 (a, 2502.9) | 1497.3(a',434.8)            | 1529.1 (a', 541.2)  |
| 1832.7(a,487.0)             | 1899.6 (a, 725.6)  | 1693.3(a',352.6)            | 1739.2 (a', 483.0)  |
| 1898.6(a,1032.8)            | 2005.8 (a, 1269.2) | 2001.8(a",825.7)            | 2100.2 (a', 2017.7) |
| 1923.7(a,120.4)             | 2031.0 (a, 113.5)  | 2008.8(a',1759.5)           | 2100.6 (a", 937.1)  |
| 2024.6(a,764.7)             | 2119.8 (a, 879.2)  | 2044.7(a',215.7)            | 2142.1 (a', 268.3)  |

**Table S14.** Theoretical harmonic vibrational frequencies (in  $\text{cm}^{-1}$ ) for the structures of  $\text{Co}_2(\text{NO})_2(\text{CO})_3$ .

| <b>23S-5(C<sub>1</sub>)</b> |                    | <b>23S-6(C<sub>1</sub>)</b> |                    |
|-----------------------------|--------------------|-----------------------------|--------------------|
| BP86                        | B3LYP              | BP86                        | B3LYP              |
| 34.7(a,0.0)                 | 35.4 (a, 0.1)      | 24.3(a,0.2)                 | 19.5 (a, 0.0)      |
| 47.1(a,1.3)                 | 51.2 (a, 0.4)      | 27.0(a,0.0)                 | 26.1 (a, 0.1)      |
| 54.2(a,0.3)                 | 62.2 (a, 0.3)      | 51.6(a,0.2)                 | 45.1 (a, 3.0)      |
| 63.8(a,0.1)                 | 64.5 (a, 0.8)      | 56.1(a,1.6)                 | 53.5 (a, 0.1)      |
| 70.2(a,0.5)                 | 72.3 (a, 0.9)      | 66.7(a,0.1)                 | 64.2 (a, 0.1)      |
| 76.7(a,0.3)                 | 74.5 (a, 0.4)      | 69.9(a,0.1)                 | 71.3 (a, 0.1)      |
| 95.7(a,0.1)                 | 96.5 (a, 0.1)      | 84.4(a,0.2)                 | 78.0 (a, 0.4)      |
| 135.9(a,0.2)                | 124.9 (a, 0.3)     | 90.1(a,0.0)                 | 91.6 (a, 0.2)      |
| 232.0(a,0.5)                | 222.9 (a, 2.9)     | 204.5(a,0.1)                | 201.8 (a, 1.5)     |
| 237.2(a,2.5)                | 235.2 (a, 0.2)     | 257.6(a,1.6)                | 259.0 (a, 3.1)     |
| 282.0(a,3.2)                | 285.5 (a, 4.1)     | 283.9(a,0.3)                | 283.2 (a, 0.1)     |
| 294.7(a,0.5)                | 304.0 (a, 0.7)     | 310.4(a,1.0)                | 319.0 (a, 2.5)     |
| 314.9(a,9.0)                | 314.0 (a, 2.5)     | 337.2(a,1.6)                | 356.4 (a, 2.7)     |
| 395.7(a,0.7)                | 408.1 (a, 7.3)     | 378.6(a,1.0)                | 388.8 (a, 2.6)     |
| 398.6(a,1.4)                | 413.2 (a, 3.5)     | 398.8(a,1.9)                | 391.2 (a, 3.9)     |
| 413.9(a,6.9)                | 425.3 (a, 6.6)     | 439.6(a,12.6)               | 425.0 (a, 22.2)    |
| 445.2(a,0.6)                | 443.2 (a, 13.4)    | 448.1(a,1.9)                | 431.7 (a, 21.8)    |
| 475.9(a,27.1)               | 469.8 (a, 37.4)    | 473.3(a,75.1)               | 452.8 (a, 37.2)    |
| 494.8(a,7.0)                | 487.7 (a, 13.9)    | 491.1(a,13.5)               | 465.6 (a, 28.1)    |
| 497.5(a,11.4)               | 503.5 (a, 19.1)    | 495.7(a,5.1)                | 495.3 (a, 2.8)     |
| 531.7(a,28.1)               | 546.1 (a, 34.2)    | 504.1(a,2.6)                | 507.7 (a, 41.4)    |
| 555.1(a,44.4)               | 573.1 (a, 45.1)    | 528.3(a,32.5)               | 542.1 (a, 41.3)    |
| 586.0(a,60.8)               | 603.6 (a, 67.1)    | 563.2(a,22.5)               | 569.8 (a, 28.8)    |
| 620.3(a,12.4)               | 644.2 (a, 8.9)     | 630.0(a,41.9)               | 668.5 (a, 12.0)    |
| 690.9(a,93.5)               | 719.1 (a, 129.6)   | 644.1(a,49.5)               | 693.2 (a, 182.2)   |
| 1667.4(a,415.3)             | 1723.8 (a, 509.5)  | 1637.6(a,489.8)             | 1674.7 (a, 611.6)  |
| 1829.2(a,1193.6)            | 1892.3 (a, 1630.7) | 1794.8(a,908.7)             | 1856.0 (a, 1103.3) |
| 1886.8(a,562.9)             | 1982.8 (a, 654.4)  | 1970.7(a,863.9)             | 2076.9 (a, 1063.5) |
| 1999.0(a,1678.6)            | 2094.1 (a, 1844.3) | 2003.9(a,1840.7)            | 2101.7 (a, 2208.0) |
| 2030.0(a,290.2)             | 2125.2 (a, 332.3)  | 2033.0(a,128.7)             | 2133.2 (a, 71.4)   |

**Table S15.** Theoretical harmonic vibrational frequencies (in  $\text{cm}^{-1}$ ) for the structures of  $\text{Co}_2(\text{NO})_2(\text{CO})_3$ .

| <b>23S-7(C<sub>2</sub>)</b> |                    | <b>23S-8(C<sub>s</sub>)</b> |                     |
|-----------------------------|--------------------|-----------------------------|---------------------|
| BP86                        | B3LYP              | BP86                        | B3LYP               |
| 21.9(b,0.0)                 | 19.2 (b, 0.1)      | 24.9(a',0.1)                | 26.9 (a', 0.2)      |
| 30.9(a,0.0)                 | 33.1 (a, 0.0)      | 54.3(a'',0.0)               | 50.1 (a'', 0.1)     |
| 56.3(a,0.2)                 | 53.1 (b, 1.2)      | 54.7(a'',0.4)               | 53.6 (a'', 0.6)     |
| 59.2(b,0.9)                 | 55.3 (a, 0.5)      | 58.2(a',0.3)                | 58.7 (a', 0.5)      |
| 64.2(a,0.2)                 | 64.0 (a, 0.2)      | 73.8(a',0.8)                | 74.1 (a', 0.5)      |
| 70.3(b,0.2)                 | 68.3 (b, 0.6)      | 77.9(a'',0.3)               | 76.6 (a'', 0.3)     |
| 76.4(a,0.2)                 | 74.6 (a, 0.2)      | 90.1(a',0.5)                | 89.1 (a', 1.0)      |
| 90.6(b,0.3)                 | 88.8 (b, 0.7)      | 191.7(a',1.1)               | 191.0 (a', 3.3)     |
| 188.9(a,0.0)                | 180.6 (a, 0.1)     | 223.7(a',4.1)               | 193.1 (a'', 0.1)    |
| 243.2(b,1.5)                | 233.8 (b, 3.9)     | 228.0(a'',0.0)              | 224.0 (a', 4.6)     |
| 281.5(b,3.3)                | 272.0 (b, 21.3)    | 270.7(a'',0.2)              | 247.3 (a'', 0.1)    |
| 296.1(a,0.0)                | 299.1 (a, 0.0)     | 297.0(a',6.5)               | 312.1 (a', 6.4)     |
| 321.5(b,3.2)                | 325.6 (b, 7.2)     | 308.9(a'',0.8)              | 317.5 (a'', 0.4)    |
| 356.9(a,0.7)                | 351.0 (b, 66.4)    | 360.4(a',0.3)               | 343.5 (a', 1.4)     |
| 366.6(b,32.7)               | 354.5 (a, 0.0)     | 408.6(a'',4.3)              | 405.9 (a'', 8.4)    |
| 434.1(a,3.1)                | 423.3 (a, 7.1)     | 426.7(a'',0.3)              | 427.5 (a'', 0.4)    |
| 460.4(b,0.2)                | 444.9 (b, 9.8)     | 442.5(a',3.7)               | 442.0 (a', 5.4)     |
| 475.3(a,2.1)                | 451.3 (a, 3.6)     | 483.1(a'',1.4)              | 483.3 (a'', 2.7)    |
| 492.9(b,72.4)               | 466.3 (b, 113.1)   | 486.1(a',16.2)              | 491.2 (a', 30.7)    |
| 494.4(a,2.3)                | 472.6 (a, 6.5)     | 506.9(a',0.7)               | 499.7 (a', 2.3)     |
| 496.4(b,68.4)               | 482.7 (b, 46.8)    | 547.3(a',2.8)               | 553.1 (a', 101.1)   |
| 538.6(a,6.4)                | 556.3 (a, 8.9)     | 566.4(a',87.6)              | 565.8 (a', 8.9)     |
| 564.4(b,9.8)                | 576.6 (b, 7.0)     | 573.5(a'',25.4)             | 594.6 (a'', 32.3)   |
| 640.6(a,6.3)                | 669.8 (a, 7.2)     | 628.6(a',0.7)               | 652.0 (a', 2.9)     |
| 646.8(b,23.2)               | 674.9 (b, 12.9)    | 636.7(a',18.6)              | 658.9 (a', 32.0)    |
| 1795.0(b,1572.8)            | 1854.1 (b, 1990.7) | 1814.7(a',1212.5)           | 1873.4 (a', 1662.5) |
| 1806.8(a,519.0)             | 1869.0 (a, 748.1)  | 1844.3(a',828.3)            | 1916.7 (a', 1203.7) |
| 1873.8(a,207.2)             | 1968.9 (a, 298.3)  | 1878.8(a'',954.2)           | 1962.0(a'', 1189.1) |
| 2000.0(b,1854.6)            | 2096.8 (b, 2061.8) | 1899.7(a',667.9)            | 1986.0 (a', 877.9)  |
| 2025.7(a,172.0)             | 2123.6 (a, 208.7)  | 2000.7(a',833.6)            | 2096.9 (a', 1022.9) |

**Table S16.** Theoretical harmonic vibrational frequencies (in  $\text{cm}^{-1}$ ) for the structures of  $\text{Co}_2(\text{NO})_2(\text{CO})_2$ .

| <b>22S-1(C<sub>1</sub>)</b> |                    | <b>22S-2</b>       |                                  |
|-----------------------------|--------------------|--------------------|----------------------------------|
| BP86                        | B3LYP              | BP86               | B3LYP                            |
| 12.4(a,1.3)                 | 21.8 (a, 0.2)      | 25.3(a',0.8)       | 37.8 (a <sub>1</sub> , 0.3)      |
| 43.5(a,0.7)                 | 29.0 (a, 0.5)      | 43.5(a'',0.2)      | 40.4 (b <sub>2</sub> , 0.1)      |
| 63.2(a,0.1)                 | 49.9 (a, 0.3)      | 53.2(a'',0.4)      | 51.0 (b <sub>1</sub> , 0.7)      |
| 69.1(a,1.4)                 | 65.9 (a, 0.7)      | 61.8(a',1.7)       | 56.6 (a <sub>2</sub> , 0.0)      |
| 91.5(a,1.3)                 | 79.2 (a, 3.4)      | 83.4(a',0.4)       | 79.7 (a <sub>1</sub> , 2.0)      |
| 145.2(a,1.9)                | 112.0 (a, 0.3)     | 177.4(a',0.2)      | 187.2 (a <sub>2</sub> , 0.0)     |
| 206.6(a,2.4)                | 234.8 (a, 1.8)     | 195.6(a'',2.6)     | 195.8 (b <sub>2</sub> , 0.7)     |
| 259.4(a,0.9)                | 239.2 (a, 1.0)     | 230.2(a'',0.1)     | 228.9 (a <sub>1</sub> , 1.0)     |
| 300.7(a,2.5)                | 316.0 (a, 0.8)     | 250.8(a',2.5)      | 248.4 (a <sub>2</sub> , 0.0)     |
| 317.6(a,6.7)                | 339.6 (a, 0.1)     | 304.9(a'',0.1)     | 310.0 (b <sub>2</sub> , 9.8)     |
| 331.3(a,4.0)                | 343.9 (a, 27.4)    | 309.8(a',13.0)     | 328.0 (b <sub>1</sub> , 3.9)     |
| 375.6(a,3.0)                | 373.1 (a, 0.7)     | 394.2(a',6.0)      | 355.9 (a <sub>1</sub> , 0.7)     |
| 431.3(a,2.2)                | 419.3 (a, 4.9)     | 416.7(a'',8.7)     | 403.6 (b <sub>1</sub> , 21.2)    |
| 438.7(a,1.4)                | 422.4 (a, 1.6)     | 418.5(a',0.4)      | 428.5 (b <sub>2</sub> , 47.2)    |
| 448.9(a,2.0)                | 456.1 (a, 39.6)    | 461.2(a',12.3)     | 433.4 (a <sub>1</sub> , 0.5)     |
| 488.3(a,15.2)               | 490.1 (a, 3.8)     | 507.7(a',6.0)      | 468.9 (a <sub>1</sub> , 1.0)     |
| 506.5(a,2.4)                | 535.8 (a, 7.0)     | 507.8(a'',0.1)     | 546.2 (a <sub>2</sub> , 0.0)     |
| 601.0(a,51.5)               | 647.4 (a, 72.7)    | 569.3(a'',12.6)    | 572.7 (b <sub>1</sub> , 4.3)     |
| 651.1(a,21.2)               | 673.6 (a, 44.0)    | 635.8(a',0.9)      | 666.0 (b <sub>2</sub> , 4.6)     |
| 669.4(a,29.2)               | 723.5 (a, 79.9)    | 653.0(a',0.9)      | 677.8 (a <sub>1</sub> , 0.0)     |
| 1636.4(a,490.6)             | 1697.7 (a, 512.6)  | 1812.0(a',2449.6)  | 1879.4 (b <sub>2</sub> , 3102.0) |
| 1826.4(a,1282.2)            | 1889.5 (a, 1851.9) | 1824.2(a',67.7)    | 1893.3 (a <sub>1</sub> , 49.4)   |
| 1867.6(a,744.5)             | 1976.7 (a, 717.5)  | 1883.8(a'',1149.7) | 1980.7 (b <sub>1</sub> , 1381.1) |
| 2006.9(a,920.7)             | 2111.5 (a, 1158.1) | 1918.7(a',44.6)    | 2017.1 (a <sub>1</sub> , 119.5)  |



**Table S17.** Theoretical harmonic vibrational frequencies (in  $\text{cm}^{-1}$ ) for the structures of  $\text{Co}_2(\text{NO})_2(\text{CO})_2$ .

| 22T-1( $\text{C}_s$ ) |                   |                     |
|-----------------------|-------------------|---------------------|
| BP86                  |                   | B3LYP               |
|                       | 27.7(a'',0.5)     | 36.2 (a'', 0.0)     |
|                       | 54.3(a',0.2)      | 54.2 (a', 0.2)      |
|                       | 65.7(a'',2.0)     | 66.7 (a'', 2.5)     |
|                       | 71.7(a',0.3)      | 69.1 (a', 0.3)      |
|                       | 95.6(a'',0.3)     | 85.6 (a'', 0.6)     |
|                       | 131.0(a',0.8)     | 115.7 (a', 0.7)     |
|                       | 228.7(a',0.8)     | 208.8 (a', 4.3)     |
|                       | 241.4(a',6.5)     | 218.7 (a', 5.6)     |
|                       | 288.3(a'',0.0)    | 257.6 (a'', 0.0)    |
|                       | 319.8(a',7.6)     | 290.3 (a', 12.7)    |
|                       | 332.9(a'',0.4)    | 316.9 (a'', 0.0)    |
|                       | 390.6(a'',0.1)    | 384.4 (a'', 0.3)    |
|                       | 416.7(a',1.4)     | 386.9 (a', 6.3)     |
|                       | 446.3(a'',0.5)    | 433.3 (a', 9.0)     |
|                       | 463.1(a',16.6)    | 452.3 (a', 13.0)    |
|                       | 470.9(a',5.6)     | 462.5 (a'', 1.3)    |
|                       | 483.2(a',2.5)     | 482.5 (a', 26.7)    |
|                       | 543.3(a',13.6)    | 528.6 (a', 77.7)    |
|                       | 608.0(a',9.2)     | 552.0 (a', 2.0)     |
|                       | 644.2(a',15.4)    | 601.7 (a', 26.9)    |
|                       | 1617.7(a',497.8)  | 1646.6 (a', 558.5)  |
|                       | 1816.8(a',1416.2) | 1848.6 (a', 1267.9) |
|                       | 1884.8(a',735.3)  | 1982.9 (a', 809.4)  |
|                       | 2016.8(a',1071.7) | 2122.4 (a', 1225.2) |

**Table S18.** Theoretical Cartesian coordinates (in Å) for the structure 14S-1 using the BP86/DZP method

Standard orientation:

| Center<br>Number | atomic<br>Number | atomic<br>Type | Coordinates (angstroms) |           |          |
|------------------|------------------|----------------|-------------------------|-----------|----------|
|                  |                  |                | X                       | Y         | Z        |
| 1                | 6                | 0              | 0.018106                | -0.846972 | 1.549893 |
| 2                | 6                | 0              | 0.115384                | 1.913188  | 0.000000 |

|    |    |   |           |           |           |
|----|----|---|-----------|-----------|-----------|
| 3  | 6  | 0 | -1.893861 | 0.190082  | 0.000000  |
| 4  | 27 | 0 | -0.060834 | 0.079536  | 0.000000  |
| 5  | 8  | 0 | 0.018106  | -1.458150 | -2.545896 |
| 6  | 8  | 0 | -3.059094 | 0.229211  | 0.000000  |
| 7  | 8  | 0 | 0.018106  | -1.458150 | 2.545896  |
| 8  | 8  | 0 | 0.159074  | 3.078332  | 0.000000  |
| 9  | 8  | 0 | 2.602714  | -1.000435 | 0.000000  |
| 10 | 6  | 0 | 0.018106  | -0.846972 | -1.549893 |
| 11 | 7  | 0 | 2.026410  | 0.038586  | 0.000000  |

---

**Table S19.** Theoretical Cartesian coordinates (in Å) for the structure **14T-1** using the BP86/DZP method

Standard orientation:

| Center<br>Number | atomic<br>Number | atomic<br>Type | Coordinates (angstroms) |           |           |
|------------------|------------------|----------------|-------------------------|-----------|-----------|
|                  |                  |                | X                       | Y         | Z         |
| 1                | 6                | 0              | -0.072575               | -0.745352 | 1.617189  |
| 2                | 6                | 0              | 0.289987                | 1.905110  | 0.000000  |
| 3                | 6                | 0              | -1.881545               | 0.314760  | 0.000000  |
| 4                | 27               | 0              | -0.091712               | 0.102326  | 0.000000  |
| 5                | 8                | 0              | -0.072575               | -1.281910 | -2.652697 |
| 6                | 8                | 0              | -3.042151               | 0.428020  | 0.000000  |
| 7                | 8                | 0              | -0.072575               | -1.281910 | 2.652697  |
| 8                | 8                | 0              | 0.463550                | 3.056976  | 0.000000  |
| 9                | 8                | 0              | 2.602662                | -1.449527 | 0.000000  |
| 10               | 6                | 0              | -0.072575               | -0.745352 | -1.617189 |
| 11               | 7                | 0              | 1.980739                | -0.415856 | 0.000000  |

**Table S20.** Theoretical Cartesian coordinates (in Å) for the structure **13S-1** using the BP86/DZP method.

Standard orientation:

| Center<br>Number | atomic<br>Number | atomic<br>Type | Coordinates (angstroms) |           |           |
|------------------|------------------|----------------|-------------------------|-----------|-----------|
|                  |                  |                | X                       | Y         | Z         |
| 1                | 6                | 0              | 0.000000                | 1.628571  | -0.665602 |
| 2                | 6                | 0              | -1.410384               | -0.814285 | -0.665602 |
| 3                | 6                | 0              | 1.410384                | -0.814285 | -0.665602 |
| 4                | 27               | 0              | 0.000000                | 0.000000  | 0.118923  |
| 5                | 7                | 0              | 0.000000                | 0.000000  | 1.785627  |
| 6                | 8                | 0              | 0.000000                | 0.000000  | 2.968560  |
| 7                | 8                | 0              | 0.000000                | 2.693122  | -1.144915 |
| 8                | 8                | 0              | 2.332312                | -1.346561 | -1.144915 |
| 9                | 8                | 0              | -2.332312               | -1.346561 | -1.144915 |

**Table S21.** Theoretical Cartesian coordinates (in Å) for the structure **13T-1** using the BP86/DZP method.

Standard orientation:

| Center<br>Number | atomic<br>Number | atomic<br>Type | Coordinates (angstroms) |   |   |
|------------------|------------------|----------------|-------------------------|---|---|
|                  |                  |                | X                       | Y | Z |

|   |    |   |           |           |           |
|---|----|---|-----------|-----------|-----------|
| 1 | 6  | 0 | -1.627052 | 0.553949  | 0.000000  |
| 2 | 6  | 0 | 0.122270  | -0.974697 | 1.511600  |
| 3 | 6  | 0 | 0.122270  | -0.974697 | -1.511600 |
| 4 | 27 | 0 | 0.126821  | 0.041327  | 0.000000  |
| 5 | 7  | 0 | 1.049264  | 1.610147  | 0.000000  |
| 6 | 8  | 0 | 2.211099  | 1.925539  | 0.000000  |
| 7 | 8  | 0 | -2.764883 | 0.812777  | 0.000000  |
| 8 | 8  | 0 | 0.122270  | -1.620044 | -2.485238 |
| 9 | 8  | 0 | 0.122270  | -1.620044 | 2.485238  |

**Table S22.** Theoretical Cartesian coordinates (in Å) for the structure **12S-1** using the BP86/DZP method.

Standard orientation:

| Center Number | atomic Number | atomic Type | Coordinates (angstroms) |           |           |
|---------------|---------------|-------------|-------------------------|-----------|-----------|
|               |               |             | X                       | Y         | Z         |
| 1             | 6             | 0           | 0.548210                | -0.720064 | 1.454729  |
| 2             | 27            | 0           | 0.306358                | 0.299386  | 0.000000  |
| 3             | 8             | 0           | 0.548210                | -1.429374 | -2.386343 |
| 4             | 8             | 0           | 0.548210                | -1.429374 | 2.386343  |
| 5             | 8             | 0           | -2.089742               | 1.766905  | 0.000000  |
| 6             | 6             | 0           | 0.548210                | -0.720064 | -1.454729 |
| 7             | 7             | 0           | -0.986230               | 1.327443  | 0.000000  |

**Table S23.** Theoretical Cartesian coordinates (in Å) for the structure **12T-1** using the BP86/DZP method.

Standard orientation:

| Center Number | atomic Number | atomic Type | Coordinates (angstroms) |           |           |
|---------------|---------------|-------------|-------------------------|-----------|-----------|
|               |               |             | X                       | Y         | Z         |
| 1             | 6             | 0           | 0.000000                | -1.479026 | -0.979984 |
| 2             | 27            | 0           | 0.000000                | 0.000000  | 0.074904  |
| 3             | 8             | 0           | 0.000000                | 2.422744  | -1.671388 |
| 4             | 8             | 0           | 0.000000                | -2.422744 | -1.671388 |
| 5             | 8             | 0           | 0.000000                | 0.000000  | 2.990166  |
| 6             | 6             | 0           | 0.000000                | 1.479026  | -0.979984 |
| 7             | 7             | 0           | 0.000000                | 0.000000  | 1.794044  |

**Table S24.** Theoretical Cartesian coordinates (in Å) for the structure 11S-1 using the BP86/DZP method.

Standard orientation:

| -----  |        |        |                         |           |          |
|--------|--------|--------|-------------------------|-----------|----------|
| Center | atomic | atomic | Coordinates (angstroms) |           |          |
| Number | Number | Type   | X                       | Y         | Z        |
| -----  |        |        |                         |           |          |
| 1      | 6      | 0      | 1.474665                | -0.241128 | 0.000000 |
| 2      | 27     | 0      | 0.000000                | 0.688270  | 0.000000 |
| 3      | 7      | 0      | -1.430696               | -0.086228 | 0.000000 |
| 4      | 8      | 0      | -2.181323               | -1.013084 | 0.000000 |
| 5      | 8      | 0      | 2.327183                | -1.053530 | 0.000000 |
| -----  |        |        |                         |           |          |

**Table S25.** Theoretical Cartesian coordinates (in Å) for the structure **11T-1** using the BP86/DZP method.

Standard orientation:

| Center<br>Number | atomic<br>Number | atomic<br>Type | Coordinates (angstroms) |           |          |
|------------------|------------------|----------------|-------------------------|-----------|----------|
|                  |                  |                | X                       | Y         | Z        |
| 1                | 6                | 0              | 1.706737                | -0.100525 | 0.000000 |
| 2                | 27               | 0              | 0.000000                | 0.410694  | 0.000000 |
| 3                | 7                | 0              | -1.613914               | -0.137872 | 0.000000 |
| 4                | 8                | 0              | -2.680027               | -0.691802 | 0.000000 |
| 5                | 8                | 0              | 2.812149                | -0.498259 | 0.000000 |

**Table S26.** Theoretical Cartesian coordinates (in Å) for the structure **25S-1** using the BP86/DZP method.

Standard orientation:

| Center<br>Number | atomic<br>Number | atomic<br>Type | Coordinates (angstroms) |           |           |
|------------------|------------------|----------------|-------------------------|-----------|-----------|
|                  |                  |                | X                       | Y         | Z         |
| 1                | 8                | 0              | -1.958074               | 1.489195  | 2.421700  |
| 2                | 8                | 0              | -1.535648               | 1.725932  | -2.370370 |
| 3                | 8                | 0              | -0.007390               | -2.607354 | 0.278565  |
| 4                | 8                | 0              | -3.760232               | -1.632325 | -0.343553 |
| 5                | 8                | 0              | 3.087444                | -0.535677 | -2.236626 |
| 6                | 8                | 0              | 2.904118                | -0.719498 | 2.333850  |
| 7                | 8                | 0              | 1.128899                | 2.859611  | 0.350671  |
| 8                | 27               | 0              | 1.317337                | -0.075277 | -0.079067 |
| 9                | 27               | 0              | -1.262908               | -0.090205 | -0.015692 |
| 10               | 6                | 0              | 1.147844                | 1.704206  | 0.177803  |
| 11               | 6                | 0              | 2.234126                | -0.498005 | 1.403067  |
| 12               | 6                | 0              | -1.423093               | 1.041122  | -1.431154 |
| 13               | 7                | 0              | -0.122424               | -1.412978 | 0.149594  |
| 14               | 6                | 0              | -1.664664               | 0.904977  | 1.454700  |
| 15               | 6                | 0              | -2.765096               | -1.035698 | -0.216197 |
| 16               | 7                | 0              | 2.191394                | -0.425692 | -1.470265 |

**Table S27.** Theoretical Cartesian coordinates (in Å) for the structure **25S-2** using the BP86/DZP method.

Standard orientation:

| Center<br>Number | atomic<br>Number | atomic<br>Type | Coordinates (angstroms) |           |           |
|------------------|------------------|----------------|-------------------------|-----------|-----------|
|                  |                  |                | X                       | Y         | Z         |
| 1                | 8                | 0              | -1.728670               | -3.182358 | 1.517142  |
| 2                | 8                | 0              | -1.722920               | -1.072074 | -2.446680 |
| 3                | 8                | 0              | 0.000000                | 0.000000  | 2.586888  |
| 4                | 8                | 0              | 2.515343                | -2.604442 | -0.217155 |
| 5                | 8                | 0              | 1.722920                | 1.072074  | -2.446680 |
| 6                | 8                | 0              | 1.728670                | 3.182358  | 1.517142  |
| 7                | 8                | 0              | -2.515343               | 2.604442  | -0.217155 |
| 8                | 27               | 0              | 0.000000                | 1.350858  | -0.024262 |
| 9                | 27               | 0              | 0.000000                | -1.350858 | -0.024262 |
| 10               | 6                | 0              | 1.075161                | 2.434174  | 0.933550  |
| 11               | 6                | 0              | -1.063769               | -1.136560 | -1.503550 |
| 12               | 6                | 0              | -1.075161               | -2.434174 | 0.933550  |
| 13               | 6                | 0              | 0.000000                | 0.000000  | 1.417280  |
| 14               | 7                | 0              | 1.517310                | -1.992445 | -0.192966 |
| 15               | 7                | 0              | -1.517310               | 1.992445  | -0.192966 |
| 16               | 6                | 0              | 1.063769                | 1.136560  | -1.503550 |

**Table S28.** Theoretical Cartesian coordinates (in Å) for the structure **25S-3** using the BP86/DZP method.

Standard orientation:

| Center<br>Number | atomic<br>Number | atomic<br>Type | Coordinates (angstroms) |           |           |
|------------------|------------------|----------------|-------------------------|-----------|-----------|
|                  |                  |                | X                       | Y         | Z         |
| 1                | 6                | 0              | -1.428914               | 2.161654  | 0.617454  |
| 2                | 6                | 0              | -1.428914               | -2.161654 | 0.617454  |
| 3                | 6                | 0              | 1.428914                | -2.161654 | 0.617454  |
| 4                | 8                | 0              | 2.333256                | 2.788169  | 1.008912  |
| 5                | 8                | 0              | 0.000000                | 1.513594  | -2.934060 |
| 6                | 8                | 0              | 0.000000                | 0.000000  | 2.561579  |
| 7                | 8                | 0              | -2.333256               | 2.788169  | 1.008912  |
| 8                | 8                | 0              | -2.333256               | -2.788169 | 1.008912  |
| 9                | 8                | 0              | 2.333256                | -2.788169 | 1.008912  |
| 10               | 8                | 0              | 0.000000                | -1.513594 | -2.934060 |
| 11               | 27               | 0              | 0.000000                | -1.324974 | -0.079478 |
| 12               | 27               | 0              | 0.000000                | 1.324974  | -0.079478 |

|    |   |   |          |           |           |
|----|---|---|----------|-----------|-----------|
| 13 | 7 | 0 | 0.000000 | 1.383636  | -1.758368 |
| 14 | 6 | 0 | 1.428914 | 2.161654  | 0.617454  |
| 15 | 6 | 0 | 0.000000 | 0.000000  | 1.376197  |
| 16 | 7 | 0 | 0.000000 | -1.383636 | -1.758368 |

---



**Table S29.** Theoretical Cartesian coordinates (in Å) for the structure 25S-4 using the BP86/DZP method.

Standard orientation:

| Center<br>Number | atomic<br>Number | atomic<br>Type | Coordinates (angstroms) |           |           |
|------------------|------------------|----------------|-------------------------|-----------|-----------|
|                  |                  |                | X                       | Y         | Z         |
| 1                | 8                | 0              | 1.557369                | 1.794569  | 2.423795  |
| 2                | 8                | 0              | 1.557369                | 1.794569  | -2.423795 |
| 3                | 8                | 0              | -2.566126               | -0.137295 | 0.000000  |
| 4                | 8                | 0              | -1.780707               | 3.684795  | 0.000000  |
| 5                | 8                | 0              | -0.841905               | -2.916688 | -2.329206 |
| 6                | 8                | 0              | -0.841905               | -2.916688 | 2.329206  |
| 7                | 8                | 0              | 2.935604                | -1.117504 | 0.000000  |
| 8                | 27               | 0              | 0.083937                | -1.320919 | 0.000000  |
| 9                | 27               | 0              | -0.112157               | 1.254996  | 0.000000  |
| 10               | 6                | 0              | 0.932888                | 1.577998  | 1.461766  |
| 11               | 6                | 0              | 0.932888                | 1.577998  | -1.461766 |
| 12               | 6                | 0              | -1.134157               | 2.712660  | 0.000000  |
| 13               | 6                | 0              | -0.537287               | -2.238581 | 1.428681  |
| 14               | 6                | 0              | -0.537287               | -2.238581 | -1.428681 |
| 15               | 7                | 0              | 1.754377                | -1.187303 | 0.000000  |
| 16               | 7                | 0              | -1.374075               | 0.036574  | 0.000000  |

**Table S30.** Theoretical Cartesian coordinates (in Å) for the structure 25S-5 using the BP86/DZP method.

Standard orientation:

| Center<br>Number | atomic<br>Number | atomic<br>Type | Coordinates (angstroms) |           |           |
|------------------|------------------|----------------|-------------------------|-----------|-----------|
|                  |                  |                | X                       | Y         | Z         |
| 1                | 6                | 0              | 0.389011                | -2.298116 | 1.423770  |
| 2                | 6                | 0              | 0.389011                | -2.298116 | -1.423770 |
| 3                | 6                | 0              | 0.665649                | 2.162635  | -1.479580 |
| 4                | 6                | 0              | 0.665649                | 2.162635  | 1.479580  |
| 5                | 6                | 0              | -1.600859               | 1.727859  | 0.000000  |
| 6                | 8                | 0              | 0.665649                | -2.995141 | -2.318562 |
| 7                | 8                | 0              | 2.501796                | -0.267384 | 0.000000  |
| 8                | 8                | 0              | -3.023061               | -1.196279 | 0.000000  |
| 9                | 8                | 0              | 0.665649                | -2.995141 | 2.318562  |
| 10               | 8                | 0              | 1.023762                | 2.811997  | 2.382454  |
| 11               | 8                | 0              | -2.729314               | 2.028008  | 0.000000  |
| 12               | 8                | 0              | 1.023762                | 2.811997  | -2.382454 |

|    |    |   |           |           |          |
|----|----|---|-----------|-----------|----------|
| 13 | 27 | 0 | 0.156301  | 1.277407  | 0.000000 |
| 14 | 27 | 0 | -0.170961 | -1.340011 | 0.000000 |
| 15 | 7  | 0 | 1.314211  | -0.062072 | 0.000000 |
| 16 | 7  | 0 | -1.840054 | -1.171573 | 0.000000 |

---

**Table S31.** Theoretical Cartesian coordinates (in Å) for the structure 25S-6 using the BP86/DZP method.

Standard orientation:

| Center<br>Number | atomic<br>Number | atomic<br>Type | Coordinates (angstroms) |           |           |
|------------------|------------------|----------------|-------------------------|-----------|-----------|
|                  |                  |                | X                       | Y         | Z         |
| 1                | 8                | 0              | 1.367762                | 1.995214  | 2.550282  |
| 2                | 8                | 0              | 1.367762                | 1.995214  | -2.550282 |
| 3                | 8                | 0              | -2.692565               | 0.053285  | 0.000000  |
| 4                | 8                | 0              | -1.739519               | 3.430046  | 0.000000  |
| 5                | 8                | 0              | -0.298181               | -2.934413 | -2.424052 |
| 6                | 8                | 0              | -0.298181               | -2.934413 | 2.424052  |
| 7                | 8                | 0              | 2.604944                | -0.570149 | 0.000000  |
| 8                | 27               | 0              | -0.188068               | -1.438599 | 0.000000  |
| 9                | 27               | 0              | 0.104148                | 1.121726  | 0.000000  |
| 10               | 6                | 0              | 0.891295                | 1.608182  | 1.557003  |
| 11               | 6                | 0              | -1.506881               | 0.021099  | 0.000000  |
| 12               | 6                | 0              | 0.891295                | 1.608182  | -1.557003 |
| 13               | 7                | 0              | -0.298181               | -2.241778 | -1.463234 |
| 14               | 6                | 0              | -1.043852               | 2.494237  | 0.000000  |
| 15               | 6                | 0              | 1.425509                | -0.454667 | 0.000000  |
| 16               | 7                | 0              | -0.298181               | -2.241778 | 1.463234  |

**Table S32.** Theoretical Cartesian coordinates (in Å) for the structure 25S-7 using the BP86/DZP method.

Standard orientation:

| Center<br>Number | atomic<br>Number | atomic<br>Type | Coordinates (angstroms) |           |           |
|------------------|------------------|----------------|-------------------------|-----------|-----------|
|                  |                  |                | X                       | Y         | Z         |
| 1                | 6                | 0              | 1.329577                | 2.273168  | 0.000000  |
| 2                | 6                | 0              | -1.681091               | 2.021351  | 0.000000  |
| 3                | 6                | 0              | 1.765247                | -1.342645 | 0.000000  |
| 4                | 8                | 0              | -2.682325               | 2.626237  | 0.000000  |
| 5                | 8                | 0              | -0.034511               | 0.703217  | 2.914538  |
| 6                | 8                | 0              | -0.034511               | 0.703217  | -2.914538 |
| 7                | 8                | 0              | 2.214624                | 3.038330  | 0.000000  |
| 8                | 8                | 0              | 2.931055                | -1.323077 | 0.000000  |
| 9                | 8                | 0              | -0.935355               | -2.410080 | -2.529754 |
| 10               | 8                | 0              | -0.935355               | -2.410080 | 2.529754  |
| 11               | 27               | 0              | -0.034855               | -1.458400 | 0.000000  |
| 12               | 27               | 0              | -0.093533               | 1.189525  | 0.000000  |

|    |   |   |           |           |           |
|----|---|---|-----------|-----------|-----------|
| 13 | 7 | 0 | -0.603874 | -1.960503 | 1.488952  |
| 14 | 7 | 0 | -0.603874 | -1.960503 | -1.488952 |
| 15 | 6 | 0 | -0.062555 | 0.797775  | 1.745895  |
| 16 | 6 | 0 | -0.062555 | 0.797775  | -1.745895 |

---

**Table S33.** Theoretical Cartesian coordinates (in Å) for the structure **25T-1** using the BP86/DZP method.

Standard orientation:

| Center<br>Number | atomic<br>Number | atomic<br>Type | Coordinates (angstroms) |           |           |
|------------------|------------------|----------------|-------------------------|-----------|-----------|
|                  |                  |                | X                       | Y         | Z         |
| 1                | 8                | 0              | -2.534606               | -0.691177 | 2.476073  |
| 2                | 8                | 0              | -1.354984               | 3.010041  | -0.084118 |
| 3                | 8                | 0              | -0.083958               | -2.568318 | -0.555899 |
| 4                | 8                | 0              | -3.600309               | -0.778733 | -1.842528 |
| 5                | 8                | 0              | 2.443495                | 2.060401  | -1.569023 |
| 6                | 8                | 0              | 3.685329                | -1.748788 | -0.280317 |
| 7                | 8                | 0              | 1.541656                | 0.778645  | 2.741324  |
| 8                | 27               | 0              | 1.257202                | -0.080691 | -0.084316 |
| 9                | 27               | 0              | -1.281697               | 0.017482  | -0.131822 |
| 10               | 6                | 0              | 1.402853                | 0.451802  | 1.628747  |
| 11               | 6                | 0              | 2.716326                | -1.100719 | -0.227834 |
| 12               | 6                | 0              | -1.305887               | 1.844821  | -0.121662 |
| 13               | 7                | 0              | -0.021352               | -1.367691 | -0.378885 |
| 14               | 6                | 0              | -2.024251               | -0.427198 | 1.460230  |
| 15               | 6                | 0              | -2.686900               | -0.486504 | -1.178664 |
| 16               | 7                | 0              | 1.632143                | 1.298672  | -1.137296 |

**Table S34.** Theoretical Cartesian coordinates (in Å) for the structure **24S-1** using the BP86/DZP method.

Standard orientation:

| Center<br>Number | atomic<br>Number | atomic<br>Type | Coordinates (angstroms) |           |           |
|------------------|------------------|----------------|-------------------------|-----------|-----------|
|                  |                  |                | X                       | Y         | Z         |
| 1                | 27               | 0              | -0.069963               | 0.031421  | 1.254178  |
| 2                | 27               | 0              | -0.069963               | 0.031421  | -1.254178 |
| 3                | 8                | 0              | 2.712342                | 0.084473  | 2.285919  |
| 4                | 8                | 0              | -0.255696               | -2.609311 | 0.000000  |
| 5                | 8                | 0              | -0.724924               | 2.600881  | 0.000000  |
| 6                | 8                | 0              | 2.712342                | 0.084473  | -2.285919 |
| 7                | 8                | 0              | -1.934999               | -0.195691 | 3.379327  |
| 8                | 8                | 0              | -1.934999               | -0.195691 | -3.379327 |
| 9                | 6                | 0              | 1.634499                | 0.064528  | -1.834871 |
| 10               | 6                | 0              | -0.121599               | -1.434965 | 0.000000  |
| 11               | 6                | 0              | -0.367325               | 1.474678  | 0.000000  |
| 12               | 6                | 0              | 1.634499                | 0.064528  | 1.834871  |

|    |   |   |           |           |           |
|----|---|---|-----------|-----------|-----------|
| 13 | 7 | 0 | -1.249641 | -0.061603 | 2.421870  |
| 14 | 7 | 0 | -1.249641 | -0.061603 | -2.421870 |

---

**Table S35.** Theoretical Cartesian coordinates (in Å) for the structure **24S-2** using the BP86/DZP method.

Standard orientation:

| Center<br>Number | atomic<br>Number | atomic<br>Type | Coordinates (angstroms) |           |           |
|------------------|------------------|----------------|-------------------------|-----------|-----------|
|                  |                  |                | X                       | Y         | Z         |
| 1                | 27               | 0              | -1.223139               | 0.038687  | -0.006485 |
| 2                | 27               | 0              | 1.258599                | -0.010181 | -0.127390 |
| 3                | 8                | 0              | -2.753529               | -2.427249 | 0.539152  |
| 4                | 8                | 0              | -0.055150               | -0.965513 | -2.542846 |
| 5                | 8                | 0              | 0.208385                | 0.394026  | 2.558709  |
| 6                | 8                | 0              | 3.285304                | -1.887916 | 0.439803  |
| 7                | 8                | 0              | -3.164066               | 2.088201  | -0.251131 |
| 8                | 8                | 0              | 2.437524                | 2.704637  | -0.285217 |
| 9                | 6                | 0              | -0.206175               | -0.525110 | -1.457281 |
| 10               | 6                | 0              | 0.129079                | 0.198803  | 1.395698  |
| 11               | 6                | 0              | -2.119079               | -1.467658 | 0.330154  |
| 12               | 7                | 0              | -2.245271               | 1.356252  | -0.089940 |
| 13               | 7                | 0              | 2.375675                | -1.234427 | 0.051801  |
| 14               | 6                | 0              | 1.939840                | 1.648647  | -0.232931 |

**Table S36.** Theoretical Cartesian coordinates (in Å) for the structure **24S-3** using the BP86/DZP method.

Standard orientation:

| Center<br>Number | atomic<br>Number | atomic<br>Type | Coordinates (angstroms) |           |           |
|------------------|------------------|----------------|-------------------------|-----------|-----------|
|                  |                  |                | X                       | Y         | Z         |
| 1                | 27               | 0              | -1.163478               | -0.081123 | -0.102462 |
| 2                | 27               | 0              | 1.248581                | -0.091261 | -0.151524 |
| 3                | 8                | 0              | -3.513357               | -1.748495 | 0.505818  |
| 4                | 8                | 0              | 0.011432                | -2.205971 | -1.611897 |
| 5                | 8                | 0              | 0.064108                | 0.683309  | 2.465398  |
| 6                | 8                | 0              | 3.617766                | -1.313419 | 0.797044  |
| 7                | 8                | 0              | -2.557321               | 2.529222  | -0.357020 |
| 8                | 8                | 0              | 1.972712                | 2.692672  | -0.914893 |
| 9                | 6                | 0              | 1.666229                | 1.612634  | -0.596329 |
| 10               | 6                | 0              | 0.055448                | 0.337266  | 1.336085  |
| 11               | 6                | 0              | -2.577726               | -1.103397 | 0.228348  |
| 12               | 6                | 0              | -1.971710               | 1.531546  | -0.189426 |
| 13               | 7                | 0              | -0.052999               | -1.165286 | -0.999116 |
| 14               | 7                | 0              | 2.611005                | -0.936493 | 0.300540  |

-----



**Table S37.** Theoretical Cartesian coordinates (in Å) for the structure **24S-4** using the BP86/DZP method.

Standard orientation:

| Center<br>Number | atomic<br>Number | atomic<br>Type | Coordinates (angstroms) |           |           |
|------------------|------------------|----------------|-------------------------|-----------|-----------|
|                  |                  |                | X                       | Y         | Z         |
| 1                | 27               | 0              | 0.000000                | 0.000000  | 1.191013  |
| 2                | 27               | 0              | 0.000000                | 0.000000  | -1.191013 |
| 3                | 8                | 0              | 0.000000                | 2.181329  | 3.182153  |
| 4                | 8                | 0              | 2.322917                | 1.192795  | 0.000000  |
| 5                | 8                | 0              | -2.322917               | -1.192795 | 0.000000  |
| 6                | 8                | 0              | 0.000000                | -2.181329 | -3.182153 |
| 7                | 8                | 0              | 0.000000                | -2.181329 | 3.182153  |
| 8                | 8                | 0              | 0.000000                | 2.181329  | -3.182153 |
| 9                | 6                | 0              | -0.074175               | -1.337495 | -2.376700 |
| 10               | 6                | 0              | 0.074175                | 1.337495  | -2.376700 |
| 11               | 7                | 0              | -1.301585               | -0.550281 | 0.000000  |
| 12               | 7                | 0              | 1.301585                | 0.550281  | 0.000000  |
| 13               | 6                | 0              | 0.074175                | 1.337495  | 2.376700  |
| 14               | 6                | 0              | -0.074175               | -1.337495 | 2.376700  |

**Table S38.** Theoretical Cartesian coordinates (in Å) for the structure **24S-5** using the BP86/DZP method.

Standard orientation:

| Center<br>Number | atomic<br>Number | atomic<br>Type | Coordinates (angstroms) |           |           |
|------------------|------------------|----------------|-------------------------|-----------|-----------|
|                  |                  |                | X                       | Y         | Z         |
| 1                | 27               | 0              | 0.000000                | 0.000000  | -1.262678 |
| 2                | 27               | 0              | 0.000000                | 0.000000  | 1.278429  |
| 3                | 8                | 0              | 0.000000                | 2.381986  | -2.815085 |
| 4                | 8                | 0              | -2.612778               | 0.000000  | 0.188627  |
| 5                | 8                | 0              | 2.612778                | 0.000000  | 0.188627  |
| 6                | 8                | 0              | 0.000000                | 2.603943  | 2.733473  |
| 7                | 8                | 0              | 0.000000                | -2.381986 | -2.815085 |
| 8                | 8                | 0              | 0.000000                | -2.603943 | 2.733473  |
| 9                | 6                | 0              | 0.000000                | 1.585889  | 2.158251  |
| 10               | 6                | 0              | 0.000000                | -1.585889 | 2.158251  |
| 11               | 7                | 0              | 0.000000                | -1.447652 | -2.090453 |
| 12               | 7                | 0              | 0.000000                | 1.447652  | -2.090453 |
| 13               | 6                | 0              | -1.428705               | 0.000000  | 0.102486  |
| 14               | 6                | 0              | 1.428705                | 0.000000  | 0.102486  |

-----

**Table S39.** Theoretical Cartesian coordinates (in Å) for the structure **23S-1** using the BP86/DZP method.

Standard orientation:

| Center<br>Number | atomic<br>Number | atomic<br>Type | Coordinates (angstroms) |           |           |
|------------------|------------------|----------------|-------------------------|-----------|-----------|
|                  |                  |                | X                       | Y         | Z         |
| 1                | 27               | 0              | 0.000000                | 0.000000  | 1.091150  |
| 2                | 27               | 0              | 0.000000                | 0.000000  | -1.091150 |
| 3                | 8                | 0              | 0.000000                | 0.000000  | 3.915658  |
| 4                | 8                | 0              | 0.000000                | 2.801844  | 0.000000  |
| 5                | 8                | 0              | 2.426468                | -1.400922 | 0.000000  |
| 6                | 8                | 0              | -2.426468               | -1.400922 | 0.000000  |
| 7                | 8                | 0              | 0.000000                | 0.000000  | -3.915658 |
| 8                | 6                | 0              | 0.000000                | 1.622029  | 0.000000  |
| 9                | 6                | 0              | -1.404718               | -0.811015 | 0.000000  |
| 10               | 7                | 0              | 0.000000                | 0.000000  | 2.731206  |
| 11               | 7                | 0              | 0.000000                | 0.000000  | -2.731206 |
| 12               | 6                | 0              | 1.404718                | -0.811015 | 0.000000  |

**Table S40.** Theoretical Cartesian coordinates (in Å) for the structure **23S-2** using the BP86/DZP method.

Standard orientation:

| Center<br>Number | atomic<br>Number | atomic<br>Type | Coordinates (angstroms) |           |           |
|------------------|------------------|----------------|-------------------------|-----------|-----------|
|                  |                  |                | X                       | Y         | Z         |
| 1                | 27               | 0              | -0.200972               | 1.354409  | 0.000000  |
| 2                | 27               | 0              | 0.240838                | -0.961602 | 0.000000  |
| 3                | 8                | 0              | -0.881682               | 4.092841  | 0.000000  |
| 4                | 8                | 0              | 0.317233                | -2.703196 | 2.409546  |
| 5                | 8                | 0              | -2.460525               | -0.429820 | 0.000000  |
| 6                | 8                | 0              | 2.667641                | 0.458351  | 0.000000  |
| 7                | 8                | 0              | 0.317233                | -2.703196 | -2.409546 |
| 8                | 6                | 0              | 0.317233                | -2.021002 | 1.462339  |
| 9                | 7                | 0              | -1.317133               | -0.046818 | 0.000000  |
| 10               | 6                | 0              | 1.494002                | 0.618087  | 0.000000  |
| 11               | 6                | 0              | 0.317233                | -2.021002 | -1.462339 |
| 12               | 7                | 0              | -0.615210               | 2.935087  | 0.000000  |

**Table S41.** Theoretical Cartesian coordinates (in Å) for the structure 23S-3 using the BP86/DZP method.

Standard orientation:

| Center<br>Number | atomic<br>Number | atomic<br>Type | Coordinates (angstroms) |           |           |
|------------------|------------------|----------------|-------------------------|-----------|-----------|
|                  |                  |                | X                       | Y         | Z         |
| 1                | 27               | 0              | 1.272818                | -0.417314 | -0.038945 |
| 2                | 27               | 0              | -1.008277               | -0.093998 | -0.011822 |
| 3                | 8                | 0              | 0.380645                | 0.952106  | -2.460244 |
| 4                | 8                | 0              | -2.592858               | 2.392743  | 0.226383  |
| 5                | 8                | 0              | 4.018423                | 0.178064  | 0.024341  |
| 6                | 8                | 0              | 0.368726                | 0.453244  | 2.599518  |
| 7                | 8                | 0              | -2.757867               | -2.325139 | -0.225289 |
| 8                | 6                | 0              | -1.943130               | 1.426099  | 0.133555  |
| 9                | 6                | 0              | 0.229380                | 0.146109  | 1.465517  |
| 10               | 7                | 0              | -1.980489               | -1.435611 | -0.141000 |
| 11               | 6                | 0              | 0.236221                | 0.428284  | -1.409292 |
| 12               | 7                | 0              | 2.892778                | -0.193773 | -0.014091 |

**Table S42.** Theoretical Cartesian coordinates (in Å) for the structure 23S-4 using the BP86/DZP method.

Standard orientation:

| Center<br>Number | atomic<br>Number | atomic<br>Type | Coordinates (angstroms) |           |           |
|------------------|------------------|----------------|-------------------------|-----------|-----------|
|                  |                  |                | X                       | Y         | Z         |
| 1                | 27               | 0              | -0.192599               | 1.351418  | 0.000000  |
| 2                | 27               | 0              | 0.581755                | -0.910357 | 0.000000  |
| 3                | 8                | 0              | -2.073982               | 3.603753  | 0.000000  |
| 4                | 8                | 0              | 0.509866                | -2.827414 | 2.259186  |
| 5                | 8                | 0              | -2.284751               | -0.504458 | 0.000000  |
| 6                | 8                | 0              | 1.923418                | 1.719082  | 0.000000  |
| 7                | 8                | 0              | 0.509866                | -2.827414 | -2.259186 |
| 8                | 6                | 0              | -1.324388               | 2.704328  | 0.000000  |
| 9                | 6                | 0              | 0.509866                | -2.058923 | -1.379882 |
| 10               | 6                | 0              | 0.509866                | -2.058923 | 1.379882  |
| 11               | 7                | 0              | 1.540787                | 0.536912  | 0.000000  |
| 12               | 7                | 0              | -1.162879               | -0.070620 | 0.000000  |

**Table S43.** Theoretical Cartesian coordinates (in Å) for the structure 23S-5 using the BP86/DZP method.

Standard orientation:

| Center<br>Number | atomic<br>Number | atomic<br>Type | Coordinates (angstroms) |           |           |
|------------------|------------------|----------------|-------------------------|-----------|-----------|
|                  |                  |                | X                       | Y         | Z         |
| 1                | 27               | 0              | -1.361169               | 0.299342  | -0.058463 |
| 2                | 27               | 0              | 1.051521                | -0.032943 | -0.072727 |
| 3                | 8                | 0              | -4.219115               | -0.407260 | -0.059250 |
| 4                | 8                | 0              | 2.319676                | 0.084962  | 2.604515  |
| 5                | 8                | 0              | -0.723833               | -2.347665 | 0.214922  |
| 6                | 8                | 0              | -0.094225               | 2.713752  | -0.388798 |
| 7                | 8                | 0              | 3.117210                | -0.658140 | -1.917352 |
| 8                | 6                | 0              | -3.087592               | -0.104114 | -0.051919 |
| 9                | 6                | 0              | 1.780240                | 0.026465  | 1.570514  |
| 10               | 7                | 0              | -0.502054               | -1.164332 | 0.116807  |
| 11               | 7                | 0              | 2.182451                | -0.444126 | -1.222368 |
| 12               | 6                | 0              | 0.207355                | 1.574524  | -0.243804 |

**Table S44.** Theoretical Cartesian coordinates (in Å) for the structure 23S-6 using the BP86/DZP method.

Standard orientation:

| Center<br>Number | atomic<br>Number | atomic<br>Type | Coordinates (angstroms) |           |           |
|------------------|------------------|----------------|-------------------------|-----------|-----------|
|                  |                  |                | X                       | Y         | Z         |
| 1                | 27               | 0              | -1.158427               | -0.154853 | 0.069614  |
| 2                | 27               | 0              | 1.196081                | -0.129098 | -0.144284 |
| 3                | 8                | 0              | -3.566241               | 1.241722  | 1.101104  |
| 4                | 8                | 0              | 1.400566                | -1.982484 | 2.137445  |
| 5                | 8                | 0              | -1.766465               | -1.651808 | -2.198569 |
| 6                | 8                | 0              | 0.017472                | 2.437724  | -0.113771 |
| 7                | 8                | 0              | 3.869479                | 1.016189  | -0.639959 |
| 8                | 7                | 0              | -1.511698               | -1.274486 | -1.102081 |
| 9                | 6                | 0              | 1.335511                | -1.345406 | 1.155033  |
| 10               | 6                | 0              | 2.806647                | 0.554354  | -0.473574 |
| 11               | 6                | 0              | -2.593470               | 0.707492  | 0.738476  |
| 12               | 7                | 0              | 0.090661                | 1.228385  | -0.154138 |

**Table S45.** Theoretical Cartesian coordinates (in Å) for the structure 23S-7 using the BP86/DZP method.

Standard orientation:

| Center<br>Number | atomic<br>Number | atomic<br>Type | Coordinates (angstroms) |           |           |
|------------------|------------------|----------------|-------------------------|-----------|-----------|
|                  |                  |                | X                       | Y         | Z         |
| 1                | 27               | 0              | 0.000000                | 1.193050  | -0.287512 |
| 2                | 27               | 0              | 0.000000                | -1.193050 | -0.287512 |
| 3                | 8                | 0              | -2.587537               | 1.870891  | -1.098055 |
| 4                | 8                | 0              | -1.366847               | -3.500706 | 0.957179  |
| 5                | 8                | 0              | 1.366847                | 3.500706  | 0.957179  |
| 6                | 8                | 0              | 0.000000                | 0.000000  | 2.389149  |
| 7                | 8                | 0              | 2.587537                | -1.870891 | -1.098055 |
| 8                | 6                | 0              | -0.879048               | -2.566713 | 0.449638  |
| 9                | 6                | 0              | 0.000000                | 0.000000  | 1.201047  |
| 10               | 7                | 0              | -1.447096               | 1.556180  | -0.995391 |
| 11               | 7                | 0              | 1.447096                | -1.556180 | -0.995391 |
| 12               | 6                | 0              | 0.879048                | 2.566713  | 0.449638  |

**Table S46.** Theoretical Cartesian coordinates (in Å) for the structure 23S-8 using the BP86/DZP method.

Standard orientation:

| Center<br>Number | atomic<br>Number | atomic<br>Type | Coordinates (angstroms) |           |           |
|------------------|------------------|----------------|-------------------------|-----------|-----------|
|                  |                  |                | X                       | Y         | Z         |
| 1                | 27               | 0              | 1.291155                | 0.237135  | 0.000000  |
| 2                | 27               | 0              | -1.095361               | 0.223567  | 0.000000  |
| 3                | 8                | 0              | 0.254762                | -0.881525 | 2.448713  |
| 4                | 8                | 0              | -1.508365               | 3.052530  | 0.000000  |
| 5                | 8                | 0              | 0.254762                | -0.881525 | -2.448713 |
| 6                | 8                | 0              | 3.975104                | -0.938721 | 0.000000  |
| 7                | 8                | 0              | -3.086297               | -1.814932 | 0.000000  |
| 8                | 6                | 0              | 2.932784                | -0.398169 | 0.000000  |
| 9                | 6                | 0              | 0.254762                | -0.394024 | -1.366882 |
| 10               | 6                | 0              | 0.254762                | -0.394024 | 1.366882  |
| 11               | 7                | 0              | -2.258620               | -0.969269 | 0.000000  |
| 12               | 7                | 0              | -1.321384               | 1.882375  | 0.000000  |

**Table S47.** Theoretical Cartesian coordinates (in Å) for the structure 22S-1 using the BP86/DZP method.

Standard orientation:

| Center<br>Number | atomic<br>Number | atomic<br>Type | Coordinates (angstroms) |           |           |
|------------------|------------------|----------------|-------------------------|-----------|-----------|
|                  |                  |                | X                       | Y         | Z         |
| 1                | 27               | 0              | 1.147313                | 0.157707  | -0.421438 |
| 2                | 27               | 0              | -1.109466               | -0.001990 | 0.184792  |
| 3                | 7                | 0              | -2.730007               | -0.194316 | 0.320977  |
| 4                | 8                | 0              | 3.681610                | -0.333876 | 1.010435  |
| 5                | 8                | 0              | -3.915164               | -0.283849 | 0.292871  |
| 6                | 8                | 0              | 0.339397                | -2.425245 | -0.510591 |
| 7                | 7                | 0              | 0.110186                | -1.260785 | -0.259112 |
| 8                | 6                | 0              | 2.735166                | -0.099140 | 0.362833  |
| 9                | 6                | 0              | -0.194070               | 1.565708  | -0.077342 |
| 10               | 8                | 0              | 0.152944                | 2.690712  | -0.262286 |

**Table S48.** Theoretical Cartesian coordinates (in Å) for the structure 22S-2 using the BP86/DZP method.

Standard orientation:

| Center<br>Number | atomic<br>Number | atomic<br>Type | Coordinates (angstroms) |           |           |
|------------------|------------------|----------------|-------------------------|-----------|-----------|
|                  |                  |                | X                       | Y         | Z         |
| 1                | 27               | 0              | -1.079615               | -0.219584 | 0.000000  |
| 2                | 27               | 0              | 1.052256                | 0.478992  | 0.000000  |
| 3                | 8                | 0              | -3.036496               | -2.239474 | 0.000000  |
| 4                | 8                | 0              | 2.736754                | 2.746095  | 0.000000  |
| 5                | 8                | 0              | 0.163744                | -0.676787 | 2.605623  |
| 6                | 8                | 0              | 0.163744                | -0.676787 | -2.605623 |
| 7                | 7                | 0              | 2.117369                | 1.731676  | 0.000000  |
| 8                | 7                | 0              | -2.324251               | -1.289505 | 0.000000  |
| 9                | 6                | 0              | 0.163744                | -0.276965 | 1.489095  |
| 10               | 6                | 0              | 0.163744                | -0.276965 | -1.489095 |

**Table S49.** Theoretical Cartesian coordinates (in Å) for the structure 22T-1 using the BP86/DZP method.

Standard orientation:

| Center<br>Number | atomic<br>Number | atomic<br>Type | Coordinates (angstroms) |   |   |
|------------------|------------------|----------------|-------------------------|---|---|
|                  |                  |                | X                       | Y | Z |

---

|    |    |   |           |           |          |
|----|----|---|-----------|-----------|----------|
| 1  | 27 | 0 | 0.218584  | -1.168007 | 0.000000 |
| 2  | 27 | 0 | 0.000000  | 1.158330  | 0.000000 |
| 3  | 7  | 0 | -0.200621 | 2.798531  | 0.000000 |
| 4  | 8  | 0 | -0.551140 | -4.035056 | 0.000000 |
| 5  | 8  | 0 | -0.244166 | 3.987721  | 0.000000 |
| 6  | 8  | 0 | -2.452961 | -0.408658 | 0.000000 |
| 7  | 7  | 0 | -1.267019 | -0.135432 | 0.000000 |
| 8  | 6  | 0 | -0.226538 | -2.912187 | 0.000000 |
| 9  | 6  | 0 | 1.616772  | 0.398341  | 0.000000 |
| 10 | 8  | 0 | 2.752055  | 0.043824  | 0.000000 |

---
